# Supplementary material for: Discovery of Bactericidal Proteins from Staphylococcus Phage Stab21 Using a High-Throughput Screening Method
Source: MDPI journal article supplement (doi:10.3390/antibiotics12071213), 2023-07-21
Supplement: s1 [file s1]

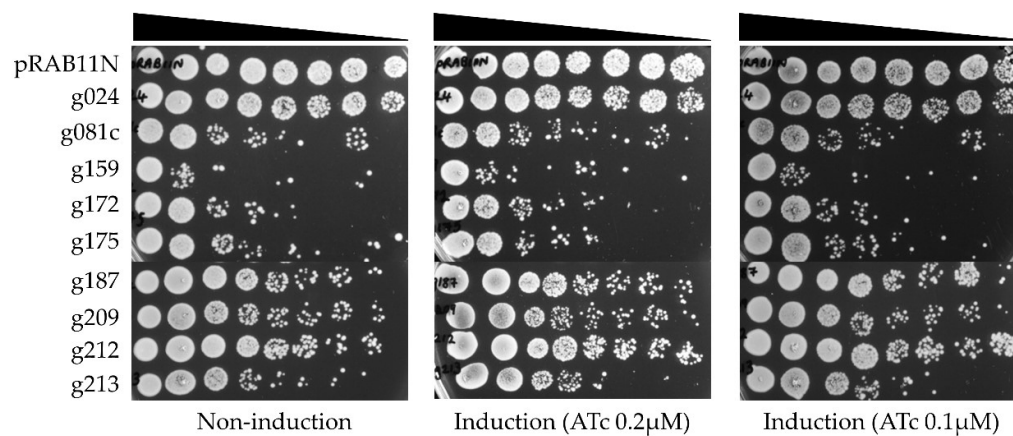

**Figure S4.** Toxicity drop test of *S. aureus* RN4220/pRAB11N-HPUFs on different concentrations of inducer. Genes under non-inducing conditions using chloramphenicol 30 μg/mL (Cm30) and genes under inducing conditions using Cm30 and either anhydrotetracycline (ATc) 0.2μM or ATc 0.1μM.
