# Supplementary material for: Discovery of Bactericidal Proteins from Staphylococcus Phage Stab21 Using a High-Throughput Screening Method
Source: MDPI journal article supplement (doi:10.3390/antibiotics12071213), 2023-07-21
Supplement: s1 [file s1]

**Table S3.** Primers and oligonucleotides used in this study. Restriction sites used in this study are marked with underscores and specified.

| Gene                                                                                      | Primer | Sequence                                     | Restriction site | Size (bp) |
|-------------------------------------------------------------------------------------------|--------|----------------------------------------------|------------------|-----------|
| Primers for pCU1LK construction.                                                          |        |                                              |                  |           |
| NOTdown                                                                                   |        | CCGGGGATCCTCTAGAGCTAGCTCCATGGTGGGCGGCCGCTGCA | NheI, NotI       |           |
| NOTup                                                                                     |        | GGCGGCCGCCACCATGGAGCTAGCTCTAGAGGATCCCCGGGTAC | NotI, NheI       |           |
| Primers for the confirmation of the construction of and correct gene insertions in pCU1LK |        |                                              |                  |           |
| Puc19-F                                                                                   |        | GTCGTGCCAGCTGCAGATCTGAATCGGCCAACGC           |                  | 717       |
| Puc19-R                                                                                   |        | TTCAGCAGAGCTCAGATACCAAAT                     |                  |           |
| Primer pairs for cloning 96 Stab21 HPuFs into pCU1LK.                                     |        |                                              |                  |           |
| Stab002                                                                                   | F      | GCAGCGGCCGCATGATAATAATACTATTTACGCAG          | NotI             | 306       |
|                                                                                           | R      | GGTGCTAGCCTATAAGAATTTCTCTATATGTTCC           | NheI             |           |
| Stab003                                                                                   | F      | GCAGCGGCCGCATGATTGATATATACTTAGGAG            | NotI             | 297       |
|                                                                                           | R      | GGTGCTAGCTTAAAATATCTCTTCTATTATTCTT           | NheI             |           |
| Stab005                                                                                   | F      | GCAGCGGCCGCATGATAGAAATTAGGTTAGACG            | NotI             | 318       |
|                                                                                           | R      | GGTGCTAGCCTAATAATCTAAGTCAAAAGGGT             | NheI             |           |
| Stab006                                                                                   | F      | GCAGCGGCCGCATGATAGAGATATACCTTAGTG            | NotI             | 291       |
|                                                                                           | R      | GGTGCTAGCTTACATCTCCTTTACATACTC               | NheI             |           |
| Stab008                                                                                   | F      | GCAGCGGCCGCATGGTTACTTTAACATACACTATT          | NotI             | 237       |
|                                                                                           | R      | GGTGGTACCCTATCCTACGTGCCAAGC                  | KpnI             |           |
| Stab009                                                                                   | F      | GCAGCGGCCGCATGATAGTTATATATACAGATGTTT         | NotI             | 345       |
|                                                                                           | R      | GGTGCTAGCTCAATCCCCGCCATAC                    | NheI             |           |
| Stab010c                                                                                  | F      | GCAGCGGCCGCATGAAAATAAACTATATTCCAA            | NotI             | 336       |
|                                                                                           | R      | GGTGCTAGCTTATAGAATATTTATAACATTGTATT          | NheI             |           |
| Stab012                                                                                   | F      | GCAGCGGCCGCATGACAAACAAAATTACTTATAC           | NotI             | 285       |
|                                                                                           | R      | GGTGCTAGCTTAATTCTTAACCGCTTCTATT              | NheI             |           |
| Stab013                                                                                   | F      | GCAGCGGCCGCATGATATTAGAAATAGAACTAA            | NotI             | 270       |
|                                                                                           | R      | GGTGCTAGCTTATTTAGTTTTTAATTCTACATTA           | NheI             |           |
| Stab017                                                                                   | F      | GCAGCGGCCGCATGAAAATGTTCAAATTACAAAA           | NotI             | 354       |
|                                                                                           | R      | GGTGCTAGCTCAATGTCTGATTGGTCT                  | NheI             |           |
| Stab018                                                                                   | F      | GCAGCGGCCGCATGAACAGATTAGAAATAGTAAA           | NotI             | 219       |
|                                                                                           | R      | GGTGCTAGCTTATGCGTATTCTTCGATT                 | NheI             |           |
| Stab020                                                                                   | F      | GCAGCGGCCGCATGATTACAATGACAAAAACAA            | NotI             | 171       |
|                                                                                           | R      | GGTGCTAGCTTAAACAGTTTCTGAGTTCTT               | NheI             |           |
| Stab021                                                                                   | F      | GCAGCGGCCGCATGACAAATACAATACAAGCAT            | NotI             | 468       |
|                                                                                           | R      | GGTGCTAGCCTACAGTGCCATTTTGTGC                 | NheI             |           |
| Stab022                                                                                   | F      | GCAGCGGCCGCATGTTGAAGATGAATAAATAC             | NotI             | 195       |
|                                                                                           | R      | GGTGCTAGCTTACATTTCTTCTACTACATAAC             | NheI             |           |
| Stab024                                                                                   | F      | GCAGCGGCCGCATGAACATTAACGAATATATAGG           | NotI             | 654       |
|                                                                                           | R      | GGTGCTAGCCTACCTCCCTAAGTCTTTT                 | NheI             |           |
| Stab026                                                                                   | F      | GCAGCGGCCGCATGATGAACATGACAAACT               | NotI             | 186       |
|                                                                                           | R      | GGTGCTAGCTTAAAATATTCCATTTGTTTTTTT            | NheI             |           |
| Stab027c                                                                                  | F      | GCAGCGGCCGCATGAAACTATACCAAGTAGAA             | NotI             | 234       |
|                                                                                           | R      | GGTGCTAGCTTAGGTATTATTAACAACCTCT              | NheI             |           |
| Stab028c                                                                                  | F      | GCAGCGGCCGCATGAACAAAGAACAAGCC                | NotI             | 483       |
|                                                                                           | R      | GGTGCTAGCTTACTTATTCTCCTTGATTTTTTTT           | NheI             |           |
| Stab029c                                                                                  | F      | GCAGCGGCCGCATGGGATTAGACTTTGAAG               | NotI             | 405       |
|                                                                                           | R      | GGTGCTAGCTTATACATTTTACTCATGATTAA             | NheI             |           |

|          |   |                                       |      |     |
|----------|---|---------------------------------------|------|-----|
| Stab030c | F | GCAGCGGCCGCATGGAAAATTATAAAAACTTTATT   | NotI | 429 |
|          | R | GGTGCTAGCTTATTTTTCCTCCTCTTCAT         | NheI |     |
| Stab031c | F | GCAGCGGCCGCATGAGATATGATATTAATGAAAAAT  | NotI | 246 |
|          | R | GGTGCTAGCTCATTGTGATTCCTCCTTA          | NheI |     |
| Stab033c | F | GCAGCGGCCGCATGAATATCAAATATATTGATTTAG  | NotI | 429 |
|          | R | GGTGCTAGCTTATTCATCTTCTTCCTCC          | NheI |     |
| Stab034c | F | GCAGCGGCCGCATGGATAAGATAAATCTCAATA     | NotI | 540 |
|          | R | GGTGCTAGCTTATATTAATAATTCTTCCATTCT     | NheI |     |
| Stab039c | F | GCAGCGGCCGCATGGAAAAATTTATATATTAGAAG   | NotI | 546 |
|          | R | GGTGCTAGCTCAAGTTAATTTATCAATTGAAT      | NheI |     |
| Stab040c | F | GCAGCGGCCGCATGAAAAATATTATTAATTTTTTAGT | NotI | 216 |
|          | R | GGTGCTAGCTTACTCCCAAATACCAATA          | NheI |     |
| Stab042c | F | GCAGCGGCCGCATGAACTTAGAAAAAGTTTC       | NotI | 735 |
|          | R | GGTGCTAGCTTATCTCTCATTATAGACCTC        | NheI |     |
| Stab043c | F | GCAGCGGCCGCATGGACTTTTACCAATTTC        | NotI | 237 |
|          | R | GGTGCTAGCTTAATAACCATGTTTAGTTACC       | NheI |     |
| Stab044c | F | GCAGCGGCCGCATGTTTAAAAAAGCACCTC        | NotI | 387 |
|          | R | GGTGCTAGCTTACTCATCTTTTTTAACGT         | NheI |     |
| Stab045c | F | GCAGCGGCCGCATGGAAAAAGTAAATCATGAG      | NotI | 171 |
|          | R | GGTGCTAGCTTATTTAGCATTGTATTTCATT       | NheI |     |
| Stab046c | F | GCAGCGGCCGCATGGCAAATGAAAAAGAGA        | NotI | 480 |
|          | R | GGTGCTAGCTCATAGGTCTTTTTCTAAGTCA       | NheI |     |
| Stab053c | F | GCAGCGGCCCGTGTCTAAAAGAACAGAC          | NotI | 324 |
|          | R | GGTGCTAGCTTAAAAATACATTAATTTAAAAAATC   | NheI |     |
| Stab056c | F | GCAGCGGCCGCATGGAAAAATCCAAGAAG         | NotI | 186 |
|          | R | GGTGCTAGCTTATTCTATATCTCCTTTAATTTCT    | NheI |     |
| Stab061c | F | GCAGCGGCCGCATGGATAATTTATCACATTACT     | NotI | 576 |
|          | R | GGTGCTAGCCTACCTCCTTGAGTAATAAATT       | NheI |     |
| Stab062c | F | GCAGCGGCCGCATGGTAAATAAAATTAACGATAAA   | NotI | 621 |
|          | R | GGTGGTACCTTATCCATCTTGTTCCCC           | KpnI |     |
| Stab065c | F | GCAGCGGCCGCATGAATTATTTAGCTAAGGTAT     | NotI | 222 |
|          | R | GGTGCTAGCTTAATTATCCTCCTTTGAATTAT      | NheI |     |
| Stab069c | F | GCAGCGGCCGCATGAAAAAAGGAGTATTTACA      | NotI | 189 |
|          | R | GGTGCTAGCCTATCCTGCATACTTATAATCC       | NheI |     |
| Stab072c | F | GCAGCGGCCGCATGAATAAATTTAAAGATGGTT     | NotI | 225 |
|          | R | GGTGCTAGCTTATTTCTCCTCTACTTTTAAAAA     | NheI |     |
| Stab075c | F | GCAGCGGCCGCATGGCACTACTTTTAACAT        | NotI | 306 |
|          | R | GGTGCTAGCTTACATTTCTCCTTTTTCTATTT      | NheI |     |
| Stab078c | F | GCAGCGGCCGCATGGCATCAGCAAAACAA         | NotI | 183 |
|          | R | GGTGCTAGCTTACTCATTAATTTGGTTTAGTTTTT   | NheI |     |
| Stab079c | F | GCAGCGGCCGCATGAAAAGACAAAAATGTTTT      | NotI | 216 |
|          | R | GGTGCTAGCTTAGTTATCTTTTGTTAATTCTTCC    | NheI |     |
| Stab080c | F | GCAGCGGCCGCATGTCAAACATATTGAAATAA      | NotI | 207 |
|          | R | GGTGCTAGCTTAGAATACTATTTTAAAGATTCT     | NheI |     |
| Stab081c | F | GCAGCGGCCGCTTGGATAAGGAGATAACAAC       | NotI | 330 |
|          | R | GGTGCTAGCCTATGCAAATTTGTTAAAGACA       | NheI |     |
| Stab083c | F | GCAGCGGCCGCATGATTATCGTATCTTTTTTCT     | NotI | 264 |
|          | R | GGTGCTAGCTTACTTATTTTGTGGTATAATAGTT    | NheI |     |
| Stab085  | F | GCAGCGGCCGCATGAAAACAAAGAAAGAAATTAAA   | NotI | 276 |

|         |   |                                       |      |     |
|---------|---|---------------------------------------|------|-----|
|         | R | GGTGGTACCTCAATCCATTTACCTCG            | KpnI |     |
| Stab086 | F | GCAGCGGCCGCTTGAGTGCAGAAAATATTAGA      | NotI | 408 |
|         | R | GGTGCTAGCTTAGAATGTTTCTGAATTTTCC       | NheI |     |
| Stab089 | F | GCAGCGGCCGCGTGATTTTATTTAGCACTATAATC   | NotI | 171 |
|         | R | GGTGCTAGCTCATTTATTTCTTCCTTCCTTT       | NheI |     |
| Stab092 | F | GCAGCGGCCGCATGAATATTATAACGTCACCTAT    | NotI | 339 |
|         | R | GGTGCTAGCTTATTTTTTATCTTTAAAGTTACTTT   | NheI |     |
| Stab093 | F | GCAGCGGCCGCTTGATATTCTCTAAAGATAAAAAATG | NotI | 369 |
|         | R | GGTGCTAGCCTAGTCACCTCTACTCCC           | NheI |     |
| Stab103 | F | GCAGCGGCCGCATGGCTAGAAAAAAGACA         | NotI | 213 |
|         | R | GGTGCTAGCTTATATATCTAATTTCTACCTAGA     | NheI |     |
| Stab107 | F | GCAGCGGCCGCATGAGTACATTTTGGTCAG        | NotI | 456 |
|         | R | GGTGCTAGCTTATTGAATTGTCAAGTCTTTAC      | NheI |     |
| Stab108 | F | GCAGCGGCCGCATGGGTATAACAATAGTAAATAG    | NotI | 192 |
|         | R | GGTGCTAGCCTACATAAATTTTAGTGACCAAT      | NheI |     |
| Stab109 | F | GCAGCGGCCGCATGTCAAGATAAAATTAAGAG      | NotI | 309 |
|         | R | GGTGCTAGCTTACTTTACATATTCACCTGTAC      | NheI |     |
| Stab131 | F | GCAGCGGCCGCATGAAAAAATATAGAGAATACCTA   | NotI | 375 |
|         | R | GGTGCTAGCTTACTTATCCCCTTTTCGTAA        | NheI |     |
| Stab135 | F | GCAGCGGCCGCATGTCAAATAAAAAAGATATTTT    | NotI | 336 |
|         | R | GGTGCTAGCTTATTCTTGTTCTCCTTTTCTTCTTC   | NheI |     |
| Stab136 | F | GCAGCGGCCGCATGGAAAAAATATTAGCACA       | NotI | 450 |
|         | R | GGTGCTAGCTTACTGTTTCGTCATTTTCT         | NheI |     |
| Stab141 | F | GCAGCGGCCGCATGGATAGAAAAGAAGCAAT       | NotI | 327 |
|         | R | GGTGCTAGCCTATTCAATTTTTTCCATCTCTG      | NheI |     |
| Stab146 | F | GCAGCGGCCGCGTGAATACGGGAGAGATT         | NotI | 240 |
|         | R | GGTGCTAGCTTAAATATTAAGTGAATACTACTT     | NheI |     |
| Stab150 | F | GCAGCGGCCGCATGGATAATTTAATAGATAAAAAACA | NotI | 351 |
|         | R | GGTGCTAGCTTAGCTTTCTTCATAAGGATT        | NheI |     |
| Stab155 | F | GCAGCGGCCGCATGGATATTCCAACAATATTATTT   | NotI | 258 |
|         | R | GGTGCTAGCCTACTCACCTACTCTTTTCAT        | NheI |     |
| Stab156 | F | GCAGCGGCCGCATGGGAATTATAGTAAACTCC      | NotI | 753 |
|         | R | GGTGCTAGCTTACTCATAACTGCTTCCTT         | NheI |     |
| Stab159 | F | GCAGCGGCCGCATGAAGTTCAATGATATTTATGA    | NotI | 309 |
|         | R | GGTGCTAGCCTATAAGAAATCCTTTTCCATTTTT    | NheI |     |
| Stab166 | F | GCAGCGGCCGCATGTTTATTTTCAATAAATCAAGAA  | NotI | 441 |
|         | R | GGTGCTAGCTTACTCAATGACAATACTATCC       | NheI |     |
| Stab169 | F | GCAGCGGCCGCATGGAAATGGCAGATTTAG        | NotI | 240 |
|         | R | GGTGCTAGCTACCTCCTTTGGTCTATTT          | NheI |     |
| Stab171 | F | GCAGCGGCCGCATGGTTATACCTAGTATTAAAGC    | NotI | 174 |
|         | R | GGTGCTAGCTTACTCACCATATCTCTCCT         | NheI |     |
| Stab172 | F | GCAGCGGCCGCATGGTGAGTAAATTTATCGG       | NotI | 249 |
|         | R | GGTGGTACCTTATTCATTTTCTTTATCCTTAATG    | KpnI |     |
| Stab173 | F | GCAGCGGCCGCATGAATAAAGGGGAATTTATTAT    | NotI | 231 |
|         | R | GGTGCTAGCTTAGCCTGTTGATTTACT           | NheI |     |
| Stab175 | F | GCAGCGGCCGCATGATAAGCTCATTTGATAGT      | NotI | 246 |
|         | R | GGTGGTACCCTATAGTAAAATATTGTTTACTGCT    | KpnI |     |
| Stab176 | F | GCAGCGGCCGCATGGATTTTAATGATTTTATAAACA  | NotI | 174 |
|         | R | GGTGCTAGCTTAGTCATTTCTTTTCTCCTT        | NheI |     |

|         |   |                                        |      |     |
|---------|---|----------------------------------------|------|-----|
| Stab177 | F | GCAGCGGCCGCATGACTAAAGAAACAAATGTAC      | NotI | 294 |
|         | R | GGTGCTAGCTTAAATGCTTCATCTGTCAA          | NheI |     |
| Stab179 | F | GCAGCGGCCGCATGGATATACTAATTATTCATTATAA  | NotI | 366 |
|         | R | GGTGCTAGCTTATAACATTAAGTCTTCATTTAAT     | NheI |     |
| Stab181 | F | GCAGCGGCCGCATGCCTATGGACTTATTAAC        | NotI | 276 |
|         | R | GGTGCTAGCTTAAGAAAATGAAAGAAGATTTATT     | NheI |     |
| Stab182 | F | GCAGCGGCCGCATGATTAATATGAGTAAAGAAAC     | NotI | 312 |
|         | R | GGTGCTAGCCTATAATTGTAACCTATGATAGTTAA    | NheI |     |
| Stab183 | F | GCAGCGGCCGCATGAGAGAAGAGTTAAAACC        | NotI | 348 |
|         | R | GGTGCTAGCTTATTTTCTCCTTTTGTAAC          | NheI |     |
| Stab185 | F | GCAGCGGCCGCATGAATGAGTGGTATGCT          | NotI | 177 |
|         | R | GGTGCTAGCTTATCTCTCCTTATCAAATTCCT       | NheI |     |
| Stab187 | F | GCAGCGGCCGCATGAAGCAGAGAGATTTTG         | NotI | 291 |
|         | R | GGTGCTAGCTTAAATATCTAATTTCTCATAACAAT    | NheI |     |
| Stab188 | F | GCAGCGGCCGCATGAACAAAGCAGTAGAA          | NotI | 285 |
|         | R | GGTGCTAGCCTACTTTATAAAACCTTAAAGTTC      | NheI |     |
| Stab190 | F | GCAGCGGCCGCATGAATGGTATTATGTATTTTAC     | NotI | 303 |
|         | R | GGTGCTAGCTTATTGACTCATCTCCTCTAA         | NheI |     |
| Stab191 | F | GCAGCGGCCGCATGGTAATTGCGTTTTTTAT        | NotI | 402 |
|         | R | GGTGCTAGCTCACTCCTTATTAAGTTCAATT        | NheI |     |
| Stab192 | F | GCAGCGGCCGCATGGAATTTATAGATAAAAAATAATGT | NotI | 234 |
|         | R | GGTGCTAGCTCATAGTATGTCCTCCTTTTT         | NheI |     |
| Stab194 | F | GCAGCGGCCCGTGGAGAAATTCAAAGGT           | NotI | 318 |
|         | R | GGTGCTAGCTTATTTCCCTCCTTCAATCT          | NheI |     |
| Stab195 | F | GCAGCGGCCGCATGGAATATTTATTTTATTTATAGG   | NotI | 228 |
|         | R | GGTGCTAGCTTAAAGAATAAAATCTTAATTTCTT     | NheI |     |
| Stab196 | F | GCAGCGGCCGCATGAAACATTTTATTTTAAATTTTAGG | NotI | 177 |
|         | R | GGTGCTAGCTTAATTTCTACTAAACATACTTCC      | NheI |     |
| Stab198 | F | GCAGCGGCCGCATGAAAGTAGAATCAATAGCA       | NotI | 315 |
|         | R | GGTGCTAGCTTATTTTCTCCTTAAAAATATCTT      | NheI |     |
| Stab199 | F | GCAGCGGCCCGGTGTCTAATAAAACTATTACAAA     | NotI | 678 |
|         | R | GGTGCTAGCTTAATTTTTAATGATACCTACTAAT     | NheI |     |
| Stab201 | F | GCAGCGGCCGCATGAATTATGAAGAGGTACT        | NotI | 222 |
|         | R | GGTGCTAGCTTAAATAAAATAGCTCCTGC          | NheI |     |
| Stab202 | F | GCAGCGGCCGCATGAATTATAGAGATTTTATTACAGA  | NotI | 198 |
|         | R | GGTGCTAGCTTATAACCCCTCCGTTGT            | NheI |     |
| Stab204 | F | GCAGCGGCCGCATGTATCCTGAAATAGATGT        | NotI | 306 |
|         | R | GGTGCTAGCTCATTTTGTGATAGCTCC            | NheI |     |
| Stab206 | F | GCAGCGGCCGCATGGTAAAATTAGATAAACTTAA     | NotI | 393 |
|         | R | GGTGCTAGCTTAGTATTCTCCTTCTGTTATT        | NheI |     |
| Stab208 | F | GCAGCGGCCGCATGATTTATAAAATATCAAAACATAA  | NotI | 243 |
|         | R | GGTGCTAGCCTATGGCTGTAACCATTC            | NheI |     |
| Stab209 | F | GCAGCGGCCGCATGATTATAGATAAAATTAAATGGAG  | NotI | 390 |
|         | R | GGTGCTAGCCTATTTCTCTCCTTTTAAATCTTT      | NheI |     |
| Stab210 | F | GCAGCGGCCGCATGAGTAATAGTTGGGAAAAA       | NotI | 195 |
|         | R | GGTGCTAGCTTATTTATCTGCTACATACTCAT       | NheI |     |
| Stab211 | F | GCAGCGGCCGCATGATGAATGGAAAACAAAT        | NotI | 294 |
|         | R | GGTGCTAGCTTACATACCTTTACATAGTC          | NheI |     |
| Stab212 | F | GCAGCGGCCGCATGAAAAAACTATTAATATTATTAC   | NotI | 309 |

|                                                                |   |                                                       |      |     |
|----------------------------------------------------------------|---|-------------------------------------------------------|------|-----|
|                                                                | R | GGTGCTAGCTTAATCTCCTTTATATATTAATTCAT                   | NheI |     |
| Stab213                                                        | F | GCAGCGGCCGCATGTATATATTAGAAAGAACAATTAG                 | NotI | 237 |
|                                                                | R | GGTGCTAGCTCATAAGTCATTCTCCAC                           | NheI |     |
| Stab215                                                        | F | GCAGCGGCCGCATGATAAATATAGAACATGATTATAC                 | NotI | 192 |
|                                                                | R | GGTGCTAGCTTACCATCGTTCAATAGATAC                        | NheI |     |
| Stab216                                                        | F | GCAGCGGCCGCATGAATGCTAGGAAAGCA                         | NotI | 351 |
|                                                                | R | GGTGCTAGCTTACCAACTAATGTATATAATAGGT                    | NheI |     |
| Primer pairs for cloning 16 potential toxic HPUFs into pBAD33. |   |                                                       |      |     |
| Stab008                                                        | F | AGCCTGGGTACCAGGAGGAAACGATGGTTACTTTAACATACACTAT<br>T   | KpnI | 204 |
|                                                                | R | AGCCTGTCTAGACTATCCTACGTGCCAAGC                        | XbaI |     |
| Stab024                                                        | F | AGCCTGGGTACCAGGAGGAAACGATGAACATTAACGAATATATAGG        | KpnI | 657 |
|                                                                | R | AGCCTGTCTAGACTACCTCCCTAAGTCTTTT                       | XbaI |     |
| Stab062c                                                       | F | AGCCTGGGTACCAGGAGGAAACGATGGTAAATAAAATTAACGATAA<br>A   | KpnI | 624 |
|                                                                | R | AGCCTGTCTAGATTATCCATCTTGTTCCCC                        | XbaI |     |
| Stab075c                                                       | F | AGCCTGGGTACCAGGAGGAAACGATGGCACTACTTTTAACAT            | KpnI | 309 |
|                                                                | R | AGCCTGTCTAGATTACATTTCTCCTTTTTCTATTT                   | XbaI |     |
| Stab081c                                                       | F | AGCCTGGGTACCAGGAGGAAACGTTGGATAAGGAGATAAAACAAC         | KpnI | 333 |
|                                                                | R | AGCCTGTCTAGACTATGCAAATTTGTTAAAGACA                    | XbaI |     |
| Stab085                                                        | F | AGCCTGGGTACCAGGAGGAAACGATGAAAACAAAGAAAGAAATTAA<br>A   | KpnI | 279 |
|                                                                | R | AGCCTGTCTAGATCAATCCATTTACCTCG                         | XbaI |     |
| Stab156                                                        | F | AGCCTGGGTACCAGGAGGAAACGATGGGAATTATAGTAAACTCC          | KpnI | 756 |
|                                                                | R | AGCCTGTCTAGATTACTCATAACTGCTTCCTT                      | XbaI |     |
| Stab159                                                        | F | AGCCTGGGTACCAGGAGGAAACGATGAAGTTCAATGATATTTATGA        | KpnI | 312 |
|                                                                | R | AGCCTGTCTAGACTATAAGAAATCCTTTTCCATTTTT                 | XbaI |     |
| Stab172                                                        | F | AGCCTGGGTACCAGGAGGAAACGATGGTGAGTAAATTTATCGG           | KpnI | 252 |
|                                                                | R | AGCCTGTCTAGATTATTCATTTTCTTTATCCTTAATG                 | XbaI |     |
| Stab175                                                        | F | AGCCTGGGTACCAGGAGGAAACGATGATAAGCTCATTGATAGT           | KpnI | 249 |
|                                                                | R | AGCCTGTCTAGACTATAGTAAATATTGTTTACTGCT                  | XbaI |     |
| Stab187                                                        | F | AGCCTGGGTACCAGGAGGAAACGATGAAGCAGAGAGATTTTG            | KpnI | 294 |
|                                                                | R | AGCCTGTCTAGATTAAATATCTAATTTCTCATAACAAT                | XbaI |     |
| Stab209                                                        | F | AGCCTGGGTACCAGGAGGAAACGATGATTATAGATAAAATTAATGG<br>AG  | KpnI | 393 |
|                                                                | R | AGCCTGTCTAGACTATTTCTCTCCTTTTAATTCTTT                  | XbaI |     |
| Stab212                                                        | F | AGCCTGGGTACCAGGAGGAAACGATGAAAAACTATTAATATTATT<br>TAC  | KpnI | 312 |
|                                                                | R | AGCCTGTCTAGATTAATCTCCTTTATATATTAATTCAT                | XbaI |     |
| Stab213                                                        | F | AGCCTGGGTACCAGGAGGAAACGATGTATATATTAGAAAGAACAAT<br>TAG | KpnI | 240 |
|                                                                | R | AGCCTGTCTAGATCATAAGTCATTCTCCAC                        | XbaI |     |
| Stab215                                                        | F | AGCCTGGGTACCAGGAGGAAACGATGATAAATATAGAACATGATTA<br>TAC | KpnI | 195 |
|                                                                | R | AGCCTGTCTAGATTACCATCGTTCAATAGATAC                     | XbaI |     |
| Stab216                                                        | F | AGCCTGGGTACCAGGAGGAAACGATGAATGCTAGGAAAGCA             | KpnI | 354 |
|                                                                | R | AGCCTGTCTAGATTACCAACTAATGTATATAATAGGT                 | XbaI |     |
| Primers for the confirmation of gene insertion in pBAD33       |   |                                                       |      |     |
| BadFor                                                         |   | CTACCTGACGCTTTTTATCGCAAC                              |      | 204 |
| BadRev                                                         |   | GCAAATCTGTTTTATCAGACCGC                               |      |     |
| Primers for pRAB11N construction.                              |   |                                                       |      |     |

|                                                                               |   |                                                    |             |     |
|-------------------------------------------------------------------------------|---|----------------------------------------------------|-------------|-----|
| pRAB-fw                                                                       |   | TCTCTATCATTGATAGAGTATGATGGTACCGTTAACAGATCTGAGC TC  | KpnI, BglII | 55  |
| pRAB-rev                                                                      |   | GCTTATTTTAATTATACTCTATCAATGAT                      |             |     |
| Primers for the confirmation of construction of and gene insertion in pRAB11N |   |                                                    |             |     |
| pRAB11-F                                                                      |   | TCTCTATCATTGATAGAGTATGAT                           |             |     |
| fR-346                                                                        |   | CAGATTGTACTGAGAGTGCACCA                            |             |     |
| Primer pairs for cloning 9 potential toxic HPUFs into pRAB11N.                |   |                                                    |             |     |
| Stab024                                                                       | F | AGCCTGGGTACCAGGAGGAAACGATGAACATTAACGAATATATAGG     | KpnI        | 657 |
|                                                                               | R | AGCCTGAGATCTCTACCTCCCTAAGTCTTTT                    | BglII       |     |
| Stab081c                                                                      | F | AGCCTGGGTACCAGGAGGAAACGTTGGATAAGGAGATAAAACAAC      | KpnI        | 333 |
|                                                                               | R | AGCCTGAGATCTCTATGCAAATTTGTTAAAGACA                 | BglII       |     |
| Stab159                                                                       | F | AGCCTGGGTACCAGGAGGAAACGATGAAGTTCAATGATATTTATGA     | KpnI        | 312 |
|                                                                               | R | AGCCTGAGATCTCTATAAGAAATCCTTTTCCATTTTT              | BglII       |     |
| Stab172                                                                       | F | AGCCTGGGTACCAGGAGGAAACGATGGTGAGTAAATTTATCGG        | KpnI        | 252 |
|                                                                               | R | AGCCTGAGATCTTTATTTCATTTTCTTTATCCTTAATG             | BglII       |     |
| Stab175                                                                       | F | AGCCTGGGTACCAGGAGGAAACGATGATAAGCTCATTTGATAGT       | KpnI        | 249 |
|                                                                               | R | AGCCTGAGATCTCTATAGTAAAAATATTGTTTACTGCT             | BglII       |     |
| Stab187                                                                       | F | AGCCTGGGTACCAGGAGGAAACGATGAAGCAGAGAGATTTTG         | KpnI        | 294 |
|                                                                               | R | AGCCTGAGATCTTTAAATATCTAATTTCTCATAACAAT             | BglII       |     |
| Stab209                                                                       | F | AGCCTGGGTACCAGGAGGAAACGATGATTATAGATAAATTAAATGG AG  | KpnI        | 393 |
|                                                                               | R | AGCCTGAGATCTCTATTTTCTCTCCTTTTAATTCTTT              | BglII       |     |
| Stab212                                                                       | F | AGCCTGGGTACCAGGAGGAAACGATGAAAAAATATTAATATTATT TAC  | KpnI        | 312 |
|                                                                               | R | AGCCTGAGATCTTTAATCTCCTTTATATATTAATTTCAT            | BglII       |     |
| Stab213                                                                       | F | AGCCTGGGTACCAGGAGGAAACGATGTATATATTAGAAAGAACAAT TAG | KpnI        | 354 |
|                                                                               | R | AGCCTGAGATCTTCATAAGTCATTCTCCAC                     | BglII       |     |
| Primers for toxic control gene ORF104                                         |   |                                                    |             |     |
| f77tox-F                                                                      |   | AGCCTGGGTACCAGGAGGAAACGATGGTAACCAAAGAATTTTAA A AC  | KpnI        | 158 |
| f77tox-R                                                                      |   | AGCCTGAGATCTTTAATATTCGACGATAGCGGG                  | BglII       |     |
