# Supplementary material for: Discovery of Bactericidal Proteins from Staphylococcus Phage Stab21 Using a High-Throughput Screening Method
Source: MDPI journal article supplement (doi:10.3390/antibiotics12071213), 2023-07-21
Supplement: s1 [file s1]

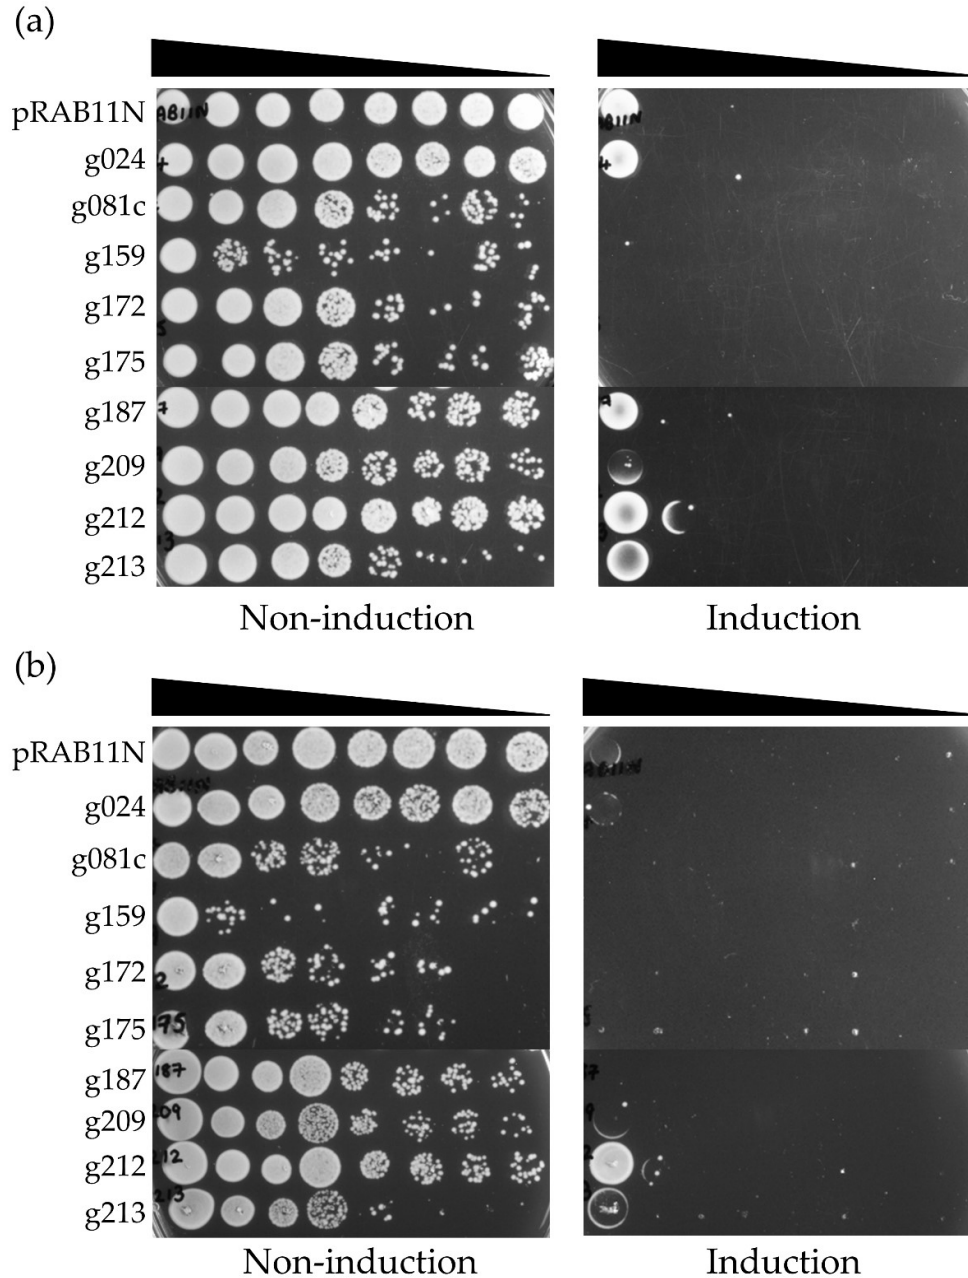

**Figure S3.** Toxicity drop test of *S. aureus* RN4220/pRAB11N-HPUFs on various concentrations of antibiotic. (a) Genes under non-inducing conditions using chloramphenicol 30  $\mu\text{g/mL}$  (Cm30) and genes under inducing conditions using Cm30 and anhydrotetracycline (ATc) 0.4 $\mu\text{M}$ . (b) Genes under non-inducing conditions using chloramphenicol 10  $\mu\text{g/mL}$  (Cm10) and genes under inducing conditions using Cm10 and ATc 0.4 $\mu\text{M}$ .
