# Supplementary material for: Discovery of Bactericidal Proteins from Staphylococcus Phage Stab21 Using a High-Throughput Screening Method
Source: MDPI journal article supplement (doi:10.3390/antibiotics12071213), 2023-07-21
Supplement: s1 [file s1]

**Table S2.** Recombinant strains used in this project. Cm30, chloramphenicol 30 µg/mL; Amp100, ampicillin 100 µg/mL. LB, lysogeny broth; LA, LB supplemented with 1.5% Bacto agar; TSA, tryptic soy agar; TSB, tryptic soy broth; “, same as previous line.

| Host/strain number      | Plasmid        | Growing condition/usage |
|-------------------------|----------------|-------------------------|
| <i>E. coli</i> DH5a     |                |                         |
| 7213                    | pBAD33-g008    | LA/LB, Cm30             |
| 7214                    | pBAD33-g024    | “                       |
| 7215                    | pBAD33-g062c   | “                       |
| 7216                    | pBAD33-g075c   | “                       |
| 7217                    | pBAD33-g081c   | “                       |
| 7218                    | pBAD33-g085    | “                       |
| 7219                    | pBAD33-g156    | “                       |
| 7220                    | pBAD33-g159    | “                       |
| 7221                    | pBAD33-g172    | “                       |
| 7222                    | pBAD33-g175    | “                       |
| 7223                    | pBAD33-g187    | “                       |
| 7224                    | pBAD33-g209    | “                       |
| 7225                    | pBAD33-g212    | “                       |
| 7226                    | pBAD33-g213    | “                       |
| 7227                    | pBAD33-g215    | “                       |
| 7228                    | pBAD33-g216    | “                       |
| 7298                    | pRAB11N-ORF104 | Toxic control           |
| <i>E. coli</i> DH10B    |                |                         |
| 7249                    | pRAB11N        | TSA/TSB, Amp100         |
| 7242                    | pRAB11N-g024   | “                       |
| 7243                    | pRAB11N-g081c  | “                       |
| 7244                    | pRAB11N-g159   | “                       |
| 7245                    | pRAB11N-g172   | “                       |
| 7246                    | pRAB11N-g175   | “                       |
| 7247                    | pRAB11N-g187   | “                       |
| 7248                    | pRAB11N-g209   | “                       |
| 7264                    | pRAB11N-g212   | “                       |
| 7265                    | pRAB11N-g213   | “                       |
| <i>S. aureus</i> RN4220 |                |                         |
| 6497                    | plasmid-free   | TSA/TSB                 |
| 7266                    | pRAB11N        | TSA/TSB, Cm30           |
| 7267                    | pRAB11N-g024   | “                       |
| 7268                    | pRAB11N-g081c  | “                       |
| 7269                    | pRAB11N-g159   | “                       |
| 7270                    | pRAB11N-g172   | “                       |
| 7271                    | pRAB11N-g175   | “                       |
| 7272                    | pRAB11N-g187   | “                       |
| 7273                    | pRAB11N-g209   | “                       |
| 7274                    | pRAB11N-g212   | “                       |
| 7275                    | pRAB11N-g213   | “                       |
| 7297                    | pRAB11N-ORF104 | Toxic control           |
