# Supplementary material for: Discovery of Bactericidal Proteins from Staphylococcus Phage Stab21 Using a High-Throughput Screening Method
Source: MDPI journal article supplement (doi:10.3390/antibiotics12071213), 2023-07-21
Supplement: s1 [file s1]

|       |                                                              |     |
|-------|--------------------------------------------------------------|-----|
| g172  | MSRLDKSKVINSALELLNEVGIEGLTTRKLAQKLGVQPTLYWHVKNKRALLDALAIEML  | 60  |
| g172T | MSRLDKSKVINSALELLNEVGIEGLTTRKLAQKLGVQPTLYWHVKNKRALLDALAIEML  | 60  |
| g187  | MSRLDKSKVINSALELLNEVGIEGLTTRKLAQKLGVQPTLYWHVKNKRALLDALAIEML  | 60  |
| g187T | MSRLDKSKVINSALELLNEVGIEGLTTRKLAQKLGVQPTLYWHVKNKRALLDALAIEML  | 60  |
|       | *****                                                        |     |
| g172  | DRHHTHFCPLEGESWQDFLRNNAKSFRCALLSHRDGAKVHLGTRPTEKQYETLENQLAFL | 120 |
| g172T | DRHHTHFCPLEGESWQDFLRNNAKSFRCALLSHRDGAKVHLGTRPTEKQYETLENQLAFL | 120 |
| g187  | DRHHTHFCPLEGESWQDFLRNNAKSFRCALLSHRDGAKVHLGTRPTEKQYETLENQLAFL | 120 |
| g187T | DRHHTHFCPLEGESWQDFLRNNAKSFRCALLSHRDGAKVHLGTRPTEKQYETLENQLAFL | 120 |
|       | *****:*****                                                  |     |
| g172  | CQQGFSLENALYALSAVGHFTLGCVLEDQEHQVAKEERETPTTDSMPLLRQAIELFDHQ  | 180 |
| g172T | CQQGFSLENALYALSAVGHFTLGCVLEDQEHQVAKEERETPTTDSMPLLRQAIELFDHQ  | 180 |
| g187  | CQQGFSLENALYALSAVGHFTLGCVLEDQEHQVAKEERETPTTDSMPLLRQAIELFDHQ  | 180 |
| g187T | CQQGFSLENALYALSAVGHFTLGCVLEDQEHQVAKEERETPTTDSMPLLRQAIELFDHQ  | 180 |
|       | *****                                                        |     |
| g172  | GAEP AFLFGLELIICGLEKQLKCESGS 207                             |     |
| g172T | GAEP AFLFGLELIICGLEKQLKCESGS 207                             |     |
| g187  | GAEP AFLFGLELIICGLEKQLKCESGS 207                             |     |
| g187T | GAEP AFLFGLELIICGLEKQLKCESGS 207                             |     |
|       | *****                                                        |     |

**Figure S7.** TetR sequence alignment of ATc sensitive pRAB11N-*g172*, *g187* and ATc tolerant pRAB11N-*g172*-T, *g187*-T. Amino acid of interest highlighted in yellow.
