# Supplementary material for: Discovery of Bactericidal Proteins from Staphylococcus Phage Stab21 Using a High-Throughput Screening Method
Source: MDPI journal article supplement (doi:10.3390/antibiotics12071213), 2023-07-21
Supplement: s1 [file s1]

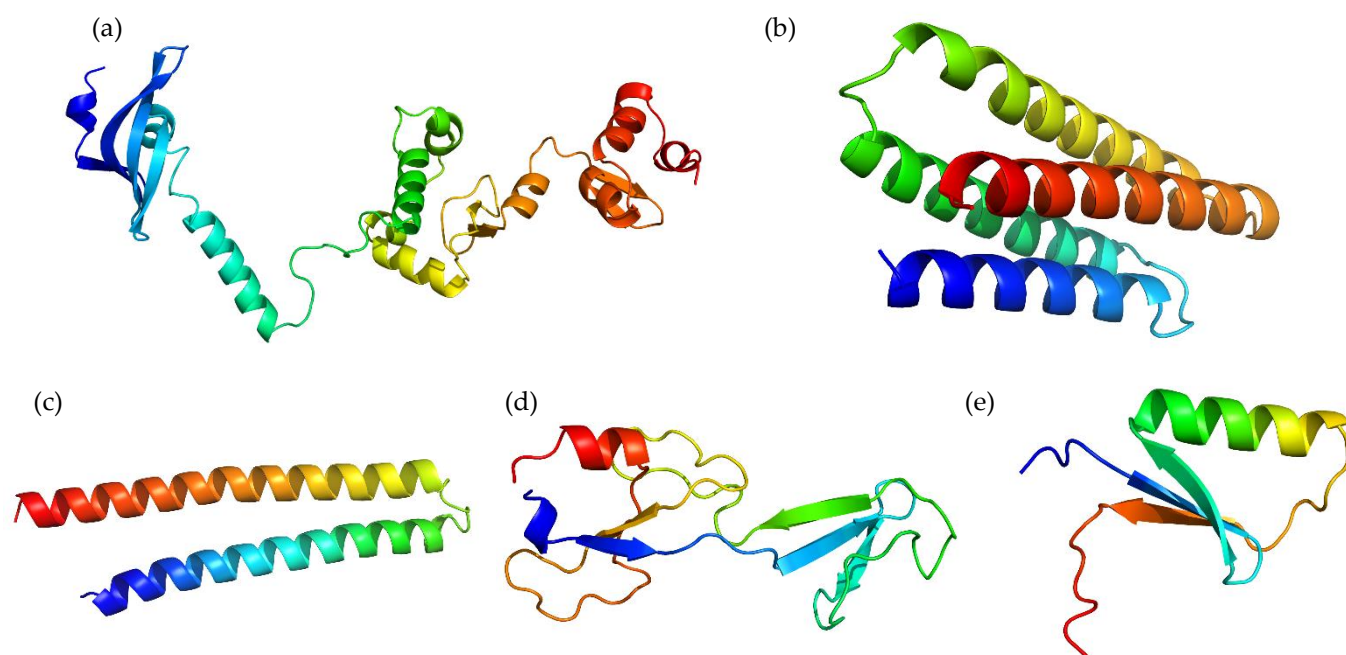

**Figure S8.** Predicted structures of the top 5 toxHPUFs (a) Gp024, (b) Gp081c, (c) Gp172, (d) Gp187 and (e) Gp213 generated by AlphaFold2. N-termini in blue and C-termini in red.
