# Supplementary material for: Discovery of Bactericidal Proteins from Staphylococcus Phage Stab21 Using a High-Throughput Screening Method
Source: MDPI journal article supplement (doi:10.3390/antibiotics12071213), 2023-07-21
Supplement: s1 [file s1]

**Table S1.** Details of the NGS assay. For each gene, two pairs of complementary sequences over the ligation joints were determined *in silico* containing 10-11 nucleotides of the gene (flanked with [start](#) and [stop](#) codon) and plasmid specific sequences. The joints are named with V, vector; G, gene fragment; F, forward; and R, reverse, indicating the directions. The joint-read totals for each gene and their percentages of total joint-reads were calculated. These were then used to calculate the plasmid DNA ligation mixture abundance ratios.

| Pool | Gene  | Joint | Joint Sequence                | Pooled ligation mixture |            |         | Pooled plasmid DNA |            |         | Plasmid/ligation ratio |
|------|-------|-------|-------------------------------|-------------------------|------------|---------|--------------------|------------|---------|------------------------|
|      |       |       |                               | N joint-reads           | Gene total | Gene %  | N joint-reads      | Gene total | Gene %  |                        |
| 1    | g002  | VGF   | ATGCCTGCAGGCGGCCGCATGATAATAA  | 0                       |            |         | 0                  |            |         |                        |
|      |       | VGR   | TTATTATCATGCGGCCGCCTGCAGGCAT  | 0                       |            |         | 23                 |            |         |                        |
|      |       | GVF   | AATTCTTAGGCTAGCTCTAGAGGATC    | 0                       |            |         | 0                  |            |         |                        |
|      |       | GVR   | GATCCTCTAGAGCTAGCCTATAAGAATT  | 0                       | 0          | 0.0000  | 0                  | 23         | 0.0036  | -                      |
|      | g003  | VGF   | ATGCCTGCAGGCGGCCGCATGATTGATA  | 1730                    |            |         | 18305              |            |         |                        |
|      |       | VGR   | TATCAATCATGCGGCCGCCTGCAGGCAT  | 16                      |            |         | 14114              |            |         |                        |
|      |       | GVF   | AGATATTTTAAAGCTAGCTCTAGAGGATC | 118                     |            |         | 16608              |            |         |                        |
|      |       | GVR   | GATCCTCTAGAGCTAGCTTAAAAATATCT | 2206                    | 4070       | 9.7964  | 16031              | 65058      | 10.0636 | 1.0273                 |
|      | g005  | VGF   | ATGCCTGCAGGCGGCCGCATGATAGAAA  | 2011                    |            |         | 13464              |            |         |                        |
|      |       | VGR   | TTTCTATCATGCGGCCGCCTGCAGGCAT  | 24                      |            |         | 10057              |            |         |                        |
|      |       | GVF   | TAGATTATTAGGCTAGCTCTAGAGGATC  | 88                      |            |         | 11375              |            |         |                        |
|      |       | GVR   | GATCCTCTAGAGCTAGCCTAATAATCTA  | 2170                    | 4293       | 10.3331 | 12502              | 47398      | 7.3318  | 0.7095                 |
|      | g006  | VGF   | ATGCCTGCAGGCGGCCGCATGATAGAGA  | 1443                    |            |         | 14081              |            |         |                        |
|      |       | VGR   | TCTCTATCATGCGGCCGCCTGCAGGCAT  | 9                       |            |         | 11108              |            |         |                        |
|      |       | GVF   | AGGAGATGTAAAGCTAGCTCTAGAGGATC | 153                     |            |         | 13754              |            |         |                        |
|      |       | GVR   | GATCCTCTAGAGCTAGCTTACATCTCCT  | 1969                    | 3574       | 8.6025  | 14576              | 53519      | 8.2787  | 0.9624                 |
|      | g008  | VGF   | ATGCCTGCAGGCGGCCGCATGGTTACTT  | 342                     |            |         | 1058               |            |         |                        |
|      |       | VGR   | AAGTAACCATGCGGCCGCCTGCAGGCAT  | 380                     |            |         | 948                |            |         |                        |
|      |       | GVF   | ACGTAGGATAGGGTACCGAGCTCGAATT  | 1619                    |            |         | 1205               |            |         |                        |
|      |       | GVR   | AATTCGAGCTCGGTACCTATCCTACGT   | 2805                    | 5146       | 12.3863 | 1014               | 4225       | 0.6535  | 0.0528                 |
|      | g009  | VGF   | ATGCCTGCAGGCGGCCGCATGATAGTTA  | 1984                    |            |         | 19842              |            |         |                        |
|      |       | VGR   | TAACTATCATGCGGCCGCCTGCAGGCAT  | 12                      |            |         | 15330              |            |         |                        |
|      |       | GVF   | GCGGGGATTGAAGCTAGCTCTAGAGGATC | 117                     |            |         | 16929              |            |         |                        |
|      |       | GVR   | GATCCTCTAGAGCTAGCTCAATCCCCGC  | 2452                    | 4565       | 10.9878 | 20046              | 72147      | 11.1601 | 1.0157                 |
|      | g010c | VGF   | ATGCCTGCAGGCGGCCGCATGAAAATAA  | 1380                    |            |         | 17371              |            |         |                        |
|      |       | VGR   | TTATTTTCATGCGGCCGCCTGCAGGCAT  | 5                       |            |         | 13694              |            |         |                        |
|      |       | GVF   | ATATTCTATAAGCTAGCTCTAGAGGATC  | 52                      | 2864       | 6.8936  | 15546              | 62033      | 9.5957  | 1.3920                 |

|             |     |                                         |      |      |         |       |       |        |        |
|-------------|-----|-----------------------------------------|------|------|---------|-------|-------|--------|--------|
|             | GVR | GATCCTCTAGAGCTAGC <b>TTA</b> TAGAATAT   | 1427 |      |         | 15422 |       |        |        |
| <i>g012</i> | VGF | ATGCCTGCAGGCGGCCGC <b>CAT</b> GACAAACA  | 1994 |      |         | 18602 |       |        |        |
|             | VGR | TGTTTGT <b>CAT</b> GCGGCCGCCTGCAGGCAT   | 11   |      |         | 10041 |       |        |        |
|             | GVF | TTAAGAAT <b>TAA</b> GCTAGCTCTAGAGGATC   | 125  |      |         | 16569 |       |        |        |
|             | GVR | GATCCTCTAGAGCTAGC <b>TTA</b> ATTCTTAA   | 2100 | 4230 | 10.1815 | 15189 | 60401 | 9.3432 | 0.9177 |
|             |     |                                         |      |      |         |       |       |        |        |
| <i>g013</i> | VGF | ATGCCTGCAGGCGGCCGC <b>CAT</b> GATATTAG  | 893  |      |         | 14591 |       |        |        |
|             | VGR | CTAATAT <b>CAT</b> GCGGCCGCCTGCAGGCAT   | 8    |      |         | 11736 |       |        |        |
|             | GVF | AAACTAA <b>TAA</b> GCTAGCTCTAGAGGATC    | 91   |      |         | 12334 |       |        |        |
|             | GVR | GATCCTCTAGAGCTAGC <b>TTA</b> TTTAGTTT   | 1043 | 2035 | 4.8982  | 12546 | 51207 | 7.9210 | 1.6171 |
|             |     |                                         |      |      |         |       |       |        |        |
| <i>g017</i> | VGF | ATGCCTGCAGGCGGCCGC <b>CAT</b> GAAAAATGT | 1640 |      |         | 11934 |       |        |        |
|             | VGR | ACATTTT <b>CAT</b> GCGGCCGCCTGCAGGCAT   | 11   |      |         | 8705  |       |        |        |
|             | GVF | TCAGACAT <b>TGA</b> GCTAGCTCTAGAGGATC   | 58   |      |         | 10723 |       |        |        |
|             | GVR | GATCCTCTAGAGCTAGC <b>TCA</b> ATGTCTGA   | 1797 | 3506 | 8.4388  | 11823 | 43185 | 6.6801 | 0.7916 |
|             |     |                                         |      |      |         |       |       |        |        |
| <i>g018</i> | VGF | ATGCCTGCAGGCGGCCGC <b>CAT</b> GAACAGAT  | 0    |      |         | 0     |       |        |        |
|             | VGR | ATCTGTT <b>CAT</b> GCGGCCGCCTGCAGGCAT   | 0    |      |         | 0     |       |        |        |
|             | GVF | AATACGCA <b>TAA</b> GCTAGCTCTAGAGGATC   | 0    |      |         | 0     |       |        |        |
|             | GVR | GATCCTCTAGAGCTAGC <b>TTA</b> TGCGTATT   | 0    | 0    | 0.0000  | 0     | 0     | 0.0000 | -      |
|             |     |                                         |      |      |         |       |       |        |        |
| <i>g020</i> | VGF | ATGCCTGCAGGCGGCCGC <b>CAT</b> GATTACAA  | 183  |      |         | 13515 |       |        |        |
|             | VGR | TTGTAAT <b>CAT</b> GCGGCCGCCTGCAGGCAT   | 15   |      |         | 11481 |       |        |        |
|             | GVF | AAACTGTT <b>TAA</b> GCTAGCTCTAGAGGATC   | 48   |      |         | 14301 |       |        |        |
|             | GVR | GATCCTCTAGAGCTAGC <b>TTA</b> AACAGTTT   | 307  | 553  | 1.3311  | 12171 | 51468 | 7.9614 | 5.9813 |
|             |     |                                         |      |      |         |       |       |        |        |
| <i>g021</i> | VGF | ATGCCTGCAGGCGGCCGC <b>CAT</b> GACAAATA  | 1264 |      |         | 7618  |       |        |        |
|             | VGR | TATTTGT <b>CAT</b> GCGGCCGCCTGCAGGCAT   | 7    |      |         | 4485  |       |        |        |
|             | GVF | TGGCACTG <b>TAG</b> GCTAGCTCTAGAGGATC   | 143  |      |         | 5766  |       |        |        |
|             | GVR | GATCCTCTAGAGCTAGC <b>CTA</b> CAGTGCCA   | 895  | 2309 | 5.5577  | 6800  | 24669 | 3.8160 | 0.6866 |
|             |     |                                         |      |      |         |       |       |        |        |
| <i>g022</i> | VGF | ATGCCTGCAGGCGGCCGC <b>CAT</b> GTTGAAGA  | 170  |      |         | 13327 |       |        |        |
|             | VGR | TCTTCAA <b>CAT</b> GCGGCCGCCTGCAGGCAT   | 9    |      |         | 12253 |       |        |        |
|             | GVF | AAGAAATG <b>TAA</b> GCTAGCTCTAGAGGATC   | 120  |      |         | 14251 |       |        |        |
|             | GVR | GATCCTCTAGAGCTAGC <b>TTA</b> CATTCTT    | 473  | 772  | 1.8582  | 13093 | 52924 | 8.1866 | 4.4057 |
|             |     |                                         |      |      |         |       |       |        |        |
| <i>g024</i> | VGF | ATGCCTGCAGGCGGCCGC <b>CAT</b> GAACATTA  | 1510 |      |         | 5473  |       |        |        |
|             | VGR | TAATGTT <b>CAT</b> GCGGCCGCCTGCAGGCAT   | 9    |      |         | 4309  |       |        |        |
|             | GVF | TAGGGAGG <b>TAG</b> GCTAGCTCTAGAGGATC   | 63   |      |         | 5354  |       |        |        |
|             | GVR | GATCCTCTAGAGCTAGC <b>CTA</b> CTCCCTA    | 1491 | 3073 | 7.3966  | 5106  | 20242 | 3.1312 | 0.4233 |
|             |     |                                         |      |      |         |       |       |        |        |
| <i>g026</i> | VGF | ATGCCTGCAGGCGGCCGC <b>CAT</b> GATGAACA  | 144  |      |         | 9578  |       |        |        |
|             | VGR | TGTT <b>CAT</b> GCGGCCGCCTGCAGGCAT      | 2    | 556  | 1.3383  | 8994  | 37971 | 5.8736 | 4.3889 |

|   |       |     |                                 |       |      |        |  |        |       |         |        |
|---|-------|-----|---------------------------------|-------|------|--------|--|--------|-------|---------|--------|
|   |       | GVF | GAATATTTTAA GCTAGCTCTAGAGGATC   | 97    |      |        |  | 11175  |       |         |        |
|   |       | GVR | GATCCTCTAGAGCTAGCTTAAAAATATTC   | 313   |      |        |  | 8224   |       |         |        |
|   | Total |     |                                 | 41546 |      |        |  | 646470 |       |         |        |
| 2 |       | VGF | ATGCCTGCAGGCGGCCGCGCATGAAACTAT  | 299   |      |        |  | 5930   |       |         |        |
|   | g027c | VGR | ATAGTTTCATGCGGCCGCGCTGCAGGCAT   | 2     |      |        |  | 6819   |       |         |        |
|   |       | GVF | ATAATACC TAA GCTAGCTCTAGAGGATC  | 357   |      |        |  | 7588   |       |         |        |
|   |       | GVR | GATCCTCTAGAGCTAGCTTA GGTATTAT   | 845   | 1503 | 5.3108 |  | 5288   | 25625 | 5.4160  | 1.0198 |
|   |       | VGF | ATGCCTGCAGGCGGCCGCGCATGAACAAAAG | 921   |      |        |  | 8265   |       |         |        |
|   | g028c | VGR | CTTTGTT CATGCGGCCGCGCTGCAGGCAT  | 2     |      |        |  | 9143   |       |         |        |
|   |       | GVF | AGAATAAG TAA GCTAGCTCTAGAGGATC  | 122   |      |        |  | 10759  |       |         |        |
|   |       | GVR | GATCCTCTAGAGCTAGCTTA CTTATTCT   | 1032  | 2077 | 7.3390 |  | 8548   | 36715 | 7.7599  | 1.0574 |
|   |       | VGF | ATGCCTGCAGGCGGCCGCGATGGGATTAG   | 747   |      |        |  | 4673   |       |         |        |
|   | g029c | VGR | CTAATCC CATGCGGCCGCGCTGCAGGCAT  | 3     |      |        |  | 5114   |       |         |        |
|   |       | GVF | TAAATGTA TAA GCTAGCTCTAGAGGATC  | 89    |      |        |  | 5773   |       |         |        |
|   |       | GVR | GATCCTCTAGAGCTAGCTTA TATACATTTA | 981   | 1820 | 6.4309 |  | 4046   | 19606 | 4.1438  | 0.6444 |
|   |       | VGF | ATGCCTGCAGGCGGCCGCGATGGAAAATT   | 867   |      |        |  | 4584   |       |         |        |
|   | g030c | VGR | AATTTTC CATGCGGCCGCGCTGCAGGCAT  | 7     |      |        |  | 5282   |       |         |        |
|   |       | GVF | AGGAAAAA TAA GCTAGCTCTAGAGGATC  | 85    |      |        |  | 6289   |       |         |        |
|   |       | GVR | GATCCTCTAGAGCTAGCTTA TTTTTCCT   | 975   | 1934 | 6.8337 |  | 4678   | 20833 | 4.4032  | 0.6443 |
|   |       | VGF | ATGCCTGCAGGCGGCCGCGATGAGATATG   | 568   |      |        |  | 3391   |       |         |        |
|   | g031c | VGR | CATATCT CATGCGGCCGCGCTGCAGGCAT  | 3     |      |        |  | 3936   |       |         |        |
|   |       | GVF | AATCACAA TGA GCTAGCTCTAGAGGATC  | 103   |      |        |  | 4924   |       |         |        |
|   |       | GVR | GATCCTCTAGAGCTAGCTCA TTGTGATT   | 1170  | 1844 | 6.5157 |  | 3363   | 15614 | 3.3001  | 0.5065 |
|   |       | VGF | ATGCCTGCAGGCGGCCGCGATGAATATCA   | 878   |      |        |  | 11930  |       |         |        |
|   | g033c | VGR | TGATATT CATGCGGCCGCGCTGCAGGCAT  | 3     |      |        |  | 11898  |       |         |        |
|   |       | GVF | AAGATGAA TAA GCTAGCTCTAGAGGATC  | 76    |      |        |  | 16237  |       |         |        |
|   |       | GVR | GATCCTCTAGAGCTAGCTTA TTCATCTT   | 794   | 1751 | 6.1871 |  | 9566   | 49631 | 10.4898 | 1.6954 |
|   |       | VGF | ATGCCTGCAGGCGGCCGCGATGGATAAGA   | 703   |      |        |  | 6452   |       |         |        |
|   | g034c | VGR | TCTTATCCATGCGGCCGCGCTGCAGGCAT   | 3     |      |        |  | 6920   |       |         |        |
|   |       | GVF | TATTAATA TAA GCTAGCTCTAGAGGATC  | 441   |      |        |  | 8702   |       |         |        |
|   |       | GVR | GATCCTCTAGAGCTAGCTTA TATTAATA   | 891   | 2038 | 7.2012 |  | 5370   | 27444 | 5.8005  | 0.8055 |
|   |       | VGF | ATGCCTGCAGGCGGCCGCGATGGAAAAAA   | 1086  |      |        |  | 9984   |       |         |        |
|   | g039c | VGR | TTTTTTC CATGCGGCCGCGCTGCAGGCAT  | 5     |      |        |  | 11647  |       |         |        |
|   |       | GVF | AATTAAC TGA GCTAGCTCTAGAGGATC   | 55    |      |        |  | 15136  |       |         |        |
|   |       | GVR | GATCCTCTAGAGCTAGCTCA AGTTAATT   | 1104  | 2250 | 7.9502 |  | 8761   | 45528 | 9.6226  | 1.2104 |

|       |       |                                        |                               |      |         |  |        |       |        |        |
|-------|-------|----------------------------------------|-------------------------------|------|---------|--|--------|-------|--------|--------|
| g040c | VGF   | ATGCCTGCAGGCGGCCGCATGAAAAATA           | 296                           |      |         |  | 7810   |       |        |        |
|       | VGR   | TATTTTTT <b>CAT</b> GCGGCCGCCTGCAGGCAT | 1                             |      |         |  | 10260  |       |        |        |
|       | GVF   | TTTGGGAG <b>TAA</b> GCTAGCTCTAGAGGATC  | 99                            |      |         |  | 12182  |       |        |        |
|       | GVR   | GATCCTCTAGAGCTAGC <b>TTA</b> CTCCCAA   | 653                           | 1049 | 3.7066  |  | 7974   | 38226 | 8.0793 | 2.1797 |
| g042c | VGF   | ATGCCTGCAGGCGGCCGCATGAACTTAG           | 1160                          |      |         |  | 7959   |       |        |        |
|       | VGR   | CTAAGTT <b>CAT</b> GCGGCCGCCTGCAGGCAT  | 3                             |      |         |  | 9039   |       |        |        |
|       | GVF   | ATGAGAGA <b>TAA</b> GCTAGCTCTAGAGGATC  | 43                            |      |         |  | 11325  |       |        |        |
|       | GVR   | GATCCTCTAGAGCTAGC <b>TTA</b> TCTCTCAT  | 1901                          | 3107 | 10.9784 |  | 8065   | 36388 | 7.6908 | 0.7005 |
| g043c | VGF   | ATGCCTGCAGGCGGCCGCATGGACTTTT           | 353                           |      |         |  | 5639   |       |        |        |
|       | VGR   | AAAAGTC <b>CAT</b> GCGGCCGCCTGCAGGCAT  | 3                             |      |         |  | 6674   |       |        |        |
|       | GVF   | ATGGTTAT <b>TAA</b> GCTAGCTCTAGAGGATC  | 117                           |      |         |  | 8861   |       |        |        |
|       | GVR   | GATCCTCTAGAGCTAGC <b>TTA</b> AATAACCAT | 926                           | 1399 | 4.9433  |  | 4945   | 26119 | 5.5204 | 1.1167 |
| g044c | VGF   | ATGCCTGCAGGCGGCCGCATGTTTAAAA           | 761                           |      |         |  | 4666   |       |        |        |
|       | VGR   | TTTTTAA <b>CAT</b> GCGGCCGCCTGCAGGCAT  | 4                             |      |         |  | 5404   |       |        |        |
|       | GVF   | AGGATGAG <b>TAA</b> GCTAGCTCTAGAGGATC  | 100                           |      |         |  | 6231   |       |        |        |
|       | GVR   | GATCCTCTAGAGCTAGC <b>TTA</b> CTCATCCT  | 1044                          | 1909 | 6.7453  |  | 5080   | 21381 | 4.5190 | 0.6699 |
| g045c | VGF   | ATGCCTGCAGGCGGCCGCATGGAAAAAG           | 79                            |      |         |  | 7532   |       |        |        |
|       | VGR   | CTTTTT <b>CAT</b> GCGGCCGCCTGCAGGCAT   | 3                             |      |         |  | 8772   |       |        |        |
|       | GVF   | ATGCTAA <b>TAA</b> GCTAGCTCTAGAGGATC   | 71                            |      |         |  | 10313  |       |        |        |
|       | GVR   | GATCCTCTAGAGCTAGC <b>TTA</b> TTTAGCAT  | 323                           | 476  | 1.6819  |  | 7217   | 33834 | 7.1510 | 4.2517 |
| g046c | VGF   | ATGCCTGCAGGCGGCCGCATGGCAAATG           | 619                           |      |         |  | 4333   |       |        |        |
|       | VGR   | CATTTGCC <b>CAT</b> GCGGCCGCCTGCAGGCAT | 3                             |      |         |  | 5196   |       |        |        |
|       | GVF   | AAGACCTA <b>TGA</b> GCTAGCTCTAGAGGATC  | 716                           |      |         |  | 5626   |       |        |        |
|       | GVR   | GATCCTCTAGAGCTAGC <b>TCA</b> TAGGTCTT  | 728                           | 2066 | 7.3001  |  | 4359   | 19514 | 4.1244 | 0.5650 |
| g053c | VGF   | ATGCCTGCAGGCGGCCGC <b>GTG</b> TCTAAAA  | 864                           |      |         |  | 5144   |       |        |        |
|       | VGR   | TTTTAGAC <b>CAC</b> GCGGCCGCCTGCAGGCAT | 5                             |      |         |  | 6568   |       |        |        |
|       | GVF   | TGTATTTT <b>TAA</b> GCTAGCTCTAGAGGATC  | 84                            |      |         |  | 6527   |       |        |        |
|       | GVR   | GATCCTCTAGAGCTAGC <b>TTA</b> AAAAATACA | 1399                          | 2352 | 8.3107  |  | 4628   | 22867 | 4.8331 | 0.5816 |
| g056c | VGF   | ATGCCTGCAGGCGGCCGCATGGAAAAAT           | 150                           |      |         |  | 7190   |       |        |        |
|       | VGR   | ATTTTT <b>CAT</b> GCGGCCGCCTGCAGGCAT   | 2                             |      |         |  | 9591   |       |        |        |
|       | GVF   | ATATAGAA <b>TAA</b> GCTAGCTCTAGAGGATC  | 174                           |      |         |  | 10619  |       |        |        |
|       | GVR   | GATCCTCTAGAGCTAGC <b>TTA</b> TTCTATAT  | 400                           | 726  | 2.5653  |  | 6410   | 33810 | 7.1460 | 2.7856 |
| Total |       |                                        | 28301                         |      |         |  | 473135 |       |        |        |
| 3     | g061c | VGF                                    | ATGCCTGCAGGCGGCCGCATGGATAAATT | 1559 |         |  | 14144  |       |        |        |
| VGR   |       | AATTAT <b>CCAT</b> GCGGCCGCCTGCAGGCAT  | 16                            | 3121 | 14.0371 |  | 10584  | 48959 | 9.5298 | 0.6789 |

|              |     |                                                |      |      |         |       |       |         |        |
|--------------|-----|------------------------------------------------|------|------|---------|-------|-------|---------|--------|
|              | GVF | CAAGGAGG <b>TAGGCTAGC</b> TCTAGAGGATC          | 208  |      |         | 12048 |       |         |        |
|              | GVR | GATCCTCTAGAG <b>GCTAGCCTA</b> CCTCCTTG         | 1338 |      |         | 12183 |       |         |        |
| <i>g062c</i> | VGF | ATGCCTGCAG <b>GCGGCCGC</b> ATGGTAAATA          | 779  |      |         | 5     |       |         |        |
|              | VGR | TATTTAC <b>CATGCGGCCGC</b> CTGCAGGCAT          | 1000 |      |         | 0     |       |         |        |
|              | GVF | AAGATGGA <b>TAA</b> GGTACCAGCTCGAATT           | 0    |      |         | 2     |       |         |        |
|              | GVR | AATTCGAGCTC <b>GGTACC</b> TTATCCATCTT          | 0    | 1779 | 8.0013  | 0     | 7     | 0.0014  | 0.0002 |
| <i>g065c</i> | VGF | ATGCCTGCAG <b>GCGGCCGC</b> ATGAATTATT          | 412  |      |         | 14899 |       |         |        |
|              | VGR | AATAATT <b>CATGCGGCCGC</b> CTGCAGGCAT          | 4    |      |         | 14530 |       |         |        |
|              | GVF | AGGATAAT <b>TAA</b> GCTAGCTCTAGAGGATC          | 81   |      |         | 15130 |       |         |        |
|              | GVR | GATCCTCTAGAG <b>GCTAGC</b> TTAATTATCCT         | 654  | 1151 | 5.1768  | 13964 | 58523 | 11.3914 | 2.2005 |
| <i>g069c</i> | VGF | ATGCCTGCAG <b>GCGGCCGC</b> ATGAAAAAAG          | 126  |      |         | 10685 |       |         |        |
|              | VGR | CTTTTTT <b>CATGCGGCCGC</b> CTGCAGGCAT          | 12   |      |         | 11462 |       |         |        |
|              | GVF | ATGCAGGA <b>TAGGCTAGC</b> TCTAGAGGATC          | 60   |      |         | 12853 |       |         |        |
|              | GVR | GATCCTCTAGAG <b>GCTAGC</b> CTATCCTGCAT         | 334  | 532  | 2.3927  | 10922 | 45922 | 8.9386  | 3.7357 |
| <i>g072c</i> | VGF | ATGCCTGCAG <b>GCGGCCGC</b> ATGAATAAAT          | 400  |      |         | 9677  |       |         |        |
|              | VGR | ATTTATT <b>CATGCGGCCGC</b> CTGCAGGCAT          | 15   |      |         | 9153  |       |         |        |
|              | GVF | AGGAGAAA <b>TAA</b> GCTAGCTCTAGAGGATC          | 611  |      |         | 10772 |       |         |        |
|              | GVR | GATCCTCTAGAG <b>GCTAGC</b> TTATTTCTCCT         | 440  | 1466 | 6.5935  | 9529  | 39131 | 7.6168  | 1.1552 |
| <i>g075c</i> | VGF | ATGCCTGCAG <b>GCGGCCGC</b> ATGGCACTAC          | 494  |      |         | 7644  |       |         |        |
|              | VGR | GTAGTG <b>CATGCGGCCGC</b> CTGCAGGCAT           | 5    |      |         | 6296  |       |         |        |
|              | GVF | GAGAAAT <b>GTAAGCTAGC</b> TCTAGAGGATC          | 226  | 27   |         | 7114  |       |         |        |
|              | GVR | GATCCTCTAGAG <b>GCTAGC</b> TTACATTCTC          | 1984 |      | 12.1840 | 6379  | 27433 | 5.3398  | 0.4383 |
| <i>g078c</i> | VGF | ATGCCTGCAG <b>GCGGCCGC</b> ATGGCATCAG          | 45   |      |         | 2562  |       |         |        |
|              | VGR | CTGATGC <b>CATGCGGCCGC</b> CTGCAGGCAT          | 0    |      |         | 2299  |       |         |        |
|              | GVF | TTAATGAG <b>TAA</b> GCTAGCTCTAGAGGATC          | 160  | 4    |         | 2929  |       |         |        |
|              | GVR | GATCCTCTAGAG <b>GCTAGC</b> TTACTCATTAA         | 276  |      | 2.1634  | 2319  | 10109 | 1.9677  | 0.9096 |
| <i>g079c</i> | VGF | ATGCCTGCAG <b>GCGGCCGC</b> ATGAAAAGAC          | 128  |      |         | 3063  |       |         |        |
|              | VGR | GTCTTTT <b>CATGCGGCCGC</b> CTGCAGGCAT          | 2    |      |         | 2689  |       |         |        |
|              | GVF | AAGATAAC <b>TAA</b> GCTAGCTCTAGAGGATC          | 60   |      |         | 3836  |       |         |        |
|              | GVR | GATCCTCTAGAG <b>GCTAGC</b> TTAGTTATCTT         | 572  | 2    | 3.4272  | 3156  | 12744 | 2.4806  | 0.7238 |
| <i>g080c</i> | VGF | ATGCCTGCAG <b>GCGGCCGC</b> ATGTCAAAAC          | 64   |      |         | 4665  |       |         |        |
|              | VGR | GTTTTGA <b>CATGCGGCCGC</b> CTGCAGGCAT          | 2    |      |         | 4205  |       |         |        |
|              | GVF | TAGTATT <b>C</b> TAA <b>GCTAGC</b> TCTAGAGGATC | 48   |      |         | 4954  |       |         |        |
|              | GVR | GATCCTCTAGAG <b>GCTAGC</b> TTAGAATACTA         | 358  | 72   | 2.1229  | 4167  | 17991 | 3.5019  | 1.6496 |
| <i>g081c</i> | VGF | ATGCCTGCAG <b>GCGGCCGC</b> TTTGATAAGG          | 349  | 1324 | 5.9548  | 42    | 152   | 0.0296  | 0.0050 |

|              |     |                                         |       |      |         |  |        |       |         |        |
|--------------|-----|-----------------------------------------|-------|------|---------|--|--------|-------|---------|--------|
|              | VGR | CCTTATC <b>CAA</b> GCGGCCGCCTGCAGGCAT   | 2     |      |         |  | 35     |       |         |        |
|              | GVF | AATTTGCA <b>TAG</b> GCTAGCTCTAGAGGATC   | 45    |      |         |  | 40     |       |         |        |
|              | GVR | GATCCTCTAGAG <b>GCTAGCCTA</b> TGCAAATT  | 928   |      |         |  | 35     |       |         |        |
| <i>g083c</i> | VGF | ATGCCTGCAG <b>GCGGCCGCATG</b> ATTATCG   | 196   |      |         |  | 5441   |       |         |        |
|              | VGR | CGATAAT <b>CAT</b> GCGGCCGCCTGCAGGCAT   | 2     |      |         |  | 4797   |       |         |        |
|              | GVF | AAAATAAG <b>TAA</b> GCTAGCTCTAGAGGATC   | 48    |      |         |  | 4993   |       |         |        |
|              | GVR | GATCCTCTAGAG <b>GCTAGCTTA</b> CTTATTTT  | 1088  | 1334 | 5.9998  |  | 4839   | 20070 | 3.9066  | 0.6511 |
| <i>g085</i>  | VGF | ATGCCTGCAG <b>GCGGCCGCATG</b> AAAACAA   | 320   |      |         |  | 1      |       |         |        |
|              | VGR | TTGTTTT <b>CAT</b> GCGGCCGCCTGCAGGCAT   | 39    |      |         |  | 1      |       |         |        |
|              | GVF | AAATGGAT <b>TGA</b> GGTACCGAGCTCGAATT   | 0     |      |         |  | 0      |       |         |        |
|              | GVR | AATTCGAGCT <b>CGGTACCTCA</b> ATCCATTT   | 0     | 359  | 1.6146  |  | 0      | 2     | 0.0004  | 0.0002 |
| <i>g086</i>  | VGF | ATGCCTGCAG <b>GCGGCCGCTTG</b> AGTGCAG   | 787   |      |         |  | 15794  |       |         |        |
|              | VGR | CTGCACT <b>CAA</b> GCGGCCGCCTGCAGGCAT   | 20    |      |         |  | 11996  |       |         |        |
|              | GVF | AAACATT <b>CTAA</b> GCTAGCTCTAGAGGATC   | 107   |      |         |  | 16324  |       |         |        |
|              | GVR | GATCCTCTAGAG <b>GCTAGCTTA</b> GAAATGTTT | 1068  | 1982 | 8.9143  |  | 16931  | 61045 | 11.8823 | 1.3329 |
| <i>g089</i>  | VGF | ATGCCTGCAG <b>GCGGCCGCGTG</b> ATTTTAT   | 91    |      |         |  | 16926  |       |         |        |
|              | VGR | ATAAAAT <b>CAC</b> GCGGCCGCCTGCAGGCAT   | 2     |      |         |  | 16141  |       |         |        |
|              | GVF | GAAATAAA <b>TGA</b> GCTAGCTCTAGAGGATC   | 118   |      |         |  | 19076  |       |         |        |
|              | GVR | GATCCTCTAGAG <b>GCTAGCTCAT</b> TTTATTTT | 232   | 443  | 1.9924  |  | 15550  | 67693 | 13.1763 | 6.6131 |
| <i>g092</i>  | VGF | ATGCCTGCAG <b>GCGGCCGCATG</b> AATATTA   | 1042  |      |         |  | 15222  |       |         |        |
|              | VGR | TAATATT <b>CAT</b> GCGGCCGCCTGCAGGCAT   | 8     |      |         |  | 11823  |       |         |        |
|              | GVF | ATAAAAA <b>TAA</b> GCTAGCTCTAGAGGATC    | 120   |      |         |  | 12184  |       |         |        |
|              | GVR | GATCCTCTAGAG <b>GCTAGCTTA</b> TTTTTTTAT | 1648  | 2818 | 12.6743 |  | 11679  | 50908 | 9.9091  | 0.7818 |
| <i>g093</i>  | VGF | ATGCCTGCAG <b>GCGGCCGCTTG</b> ATATTCT   | 575   |      |         |  | 13067  |       |         |        |
|              | VGR | AGAATAT <b>CAA</b> GCGGCCGCCTGCAGGCAT   | 0     |      |         |  | 11160  |       |         |        |
|              | GVF | GAGGTGAC <b>TAG</b> GCTAGCTCTAGAGGATC   | 50    |      |         |  | 14443  |       |         |        |
|              | GVR | GATCCTCTAGAG <b>GCTAGCTA</b> GTACCTC    | 876   | 1501 | 6.7509  |  | 14390  | 53060 | 10.3280 | 1.5299 |
| <i>Total</i> |     |                                         | 22234 |      |         |  | 513749 |       |         |        |
| 4            | VGF | ATGCCTGCAG <b>GCGGCCGCATG</b> GCTAGAA   | 295   |      |         |  | 14649  |       |         |        |
|              | VGR | TTCTAG <b>CCAT</b> GCGGCCGCCTGCAGGCAT   | 3     |      |         |  | 14742  |       |         |        |
|              | GVF | TAGATATA <b>TAA</b> GCTAGCTCTAGAGGATC   | 136   |      |         |  | 14589  |       |         |        |
|              | GVR | GATCCTCTAGAG <b>GCTAGCTTA</b> TATATCTA  | 578   | 1012 | 2.5216  |  | 13232  | 57212 | 6.7445  | 2.6747 |
| <i>g107</i>  | VGF | ATGCCTGCAG <b>GCGGCCGCATG</b> AGTACAT   | 423   |      |         |  | 5214   |       |         |        |
|              | VGR | ATGTACT <b>CAT</b> GCGGCCGCCTGCAGGCAT   | 6     |      |         |  | 4472   |       |         |        |
|              | GVF | CAATTCAA <b>TAA</b> GCTAGCTCTAGAGGATC   | 25    | 1185 | 2.9527  |  | 4733   | 19181 | 2.2612  | 0.7658 |

|      |     |                                        |      |      |         |       |       |         |        |
|------|-----|----------------------------------------|------|------|---------|-------|-------|---------|--------|
|      | GVR | GATCCTCTAGAGCTAGC <b>TTA</b> TTGAATTG  | 731  |      |         | 4762  |       |         |        |
| g108 | VGF | ATGCCTGCAGGCGGCCGC <b>ATG</b> GGTATAA  | 196  |      |         | 10591 |       |         |        |
|      | VGR | TTATACC <b>CAT</b> GCGGCCGCCTGCAGGCAT  | 1    |      |         | 11567 |       |         |        |
|      | GVF | AATTTATG <b>TAG</b> GCTAGCTCTAGAGGATC  | 37   |      |         | 12880 |       |         |        |
|      | GVR | GATCCTCTAGAGCTAGC <b>CTA</b> CATAAATT  | 282  | 516  | 1.2857  | 10029 | 45067 | 5.3128  | 4.1321 |
| g109 | VGF | ATGCCTGCAGGCGGCCGC <b>ATG</b> TCACAAG  | 1462 |      |         | 11628 |       |         |        |
|      | VGR | CTTGTGA <b>CAT</b> GCGGCCGCCTGCAGGCAT  | 8    |      |         | 9564  |       |         |        |
|      | GVF | ATGTAAAG <b>TAA</b> GCTAGCTCTAGAGGATC  | 70   |      |         | 12109 |       |         |        |
|      | GVR | GATCCTCTAGAGCTAGC <b>TTA</b> CTTTACAT  | 1883 | 3423 | 8.5291  | 10600 | 43901 | 5.1753  | 0.6068 |
| g131 | VGF | ATGCCTGCAGGCGGCCGC <b>ATG</b> AAAAAAT  | 2010 |      |         | 19918 |       |         |        |
|      | VGR | ATTTTTT <b>CAT</b> GCGGCCGCCTGCAGGCAT  | 19   |      |         | 17931 |       |         |        |
|      | GVF | GGGATAAG <b>TAA</b> GCTAGCTCTAGAGGATC  | 88   |      |         | 20080 |       |         |        |
|      | GVR | GATCCTCTAGAGCTAGC <b>TTA</b> CTTATCCC  | 1687 | 3804 | 9.4785  | 19345 | 77274 | 9.1095  | 0.9611 |
| g135 | VGF | ATGCCTGCAGGCGGCCGC <b>ATG</b> TCAAAATA | 2214 |      |         | 21754 |       |         |        |
|      | VGR | TATTTGA <b>CAT</b> GCGGCCGCCTGCAGGCAT  | 9    |      |         | 17892 |       |         |        |
|      | GVF | AACAAGAA <b>TAA</b> GCTAGCTCTAGAGGATC  | 211  |      |         | 23892 |       |         |        |
|      | GVR | GATCCTCTAGAGCTAGC <b>TTA</b> TTCTTGTT  | 2045 | 4479 | 11.1604 | 17129 | 80667 | 9.5095  | 0.8521 |
| g136 | VGF | ATGCCTGCAGGCGGCCGC <b>ATG</b> GAAAAAA  | 1044 |      |         | 10515 |       |         |        |
|      | VGR | TTTTTTC <b>CAT</b> GCGGCCGCCTGCAGGCAT  | 2    |      |         | 8105  |       |         |        |
|      | GVF | ACGAACAG <b>TAA</b> GCTAGCTCTAGAGGATC  | 114  |      |         | 11642 |       |         |        |
|      | GVR | GATCCTCTAGAGCTAGC <b>TTA</b> CTGTTCGT  | 1294 | 2454 | 6.1147  | 9623  | 39885 | 4.7019  | 0.7690 |
| g141 | VGF | ATGCCTGCAGGCGGCCGC <b>ATG</b> GATAGAA  | 1840 |      |         | 17450 |       |         |        |
|      | VGR | TTCTATC <b>CAT</b> GCGGCCGCCTGCAGGCAT  | 9    |      |         | 16618 |       |         |        |
|      | GVF | AAAATGAA <b>TAG</b> GCTAGCTCTAGAGGATC  | 81   |      |         | 18377 |       |         |        |
|      | GVR | GATCCTCTAGAGCTAGC <b>CTA</b> TTCATTTT  | 1621 | 3551 | 8.8481  | 16339 | 68784 | 8.1087  | 0.9164 |
| g146 | VGF | ATGCCTGCAGGCGGCCGC <b>GTG</b> AATACGG  | 764  |      |         | 22415 |       |         |        |
|      | VGR | CCGTATT <b>CAC</b> GCGGCCGCCTGCAGGCAT  | 7    |      |         | 21605 |       |         |        |
|      | GVF | TTAATATT <b>TAA</b> GCTAGCTCTAGAGGATC  | 75   |      |         | 22639 |       |         |        |
|      | GVR | GATCCTCTAGAGCTAGC <b>TTA</b> AATATTAA  | 877  | 1723 | 4.2932  | 19599 | 86258 | 10.1686 | 2.3685 |
| g150 | VGF | ATGCCTGCAGGCGGCCGC <b>ATG</b> GATAAATT | 2145 |      |         | 16698 |       |         |        |
|      | VGR | AATTATC <b>CAT</b> GCGGCCGCCTGCAGGCAT  | 4    |      |         | 14616 |       |         |        |
|      | GVF | AAGAAAGC <b>TAA</b> GCTAGCTCTAGAGGATC  | 56   |      |         | 18003 |       |         |        |
|      | GVR | GATCCTCTAGAGCTAGC <b>TTA</b> GCTTTCTT  | 2049 | 4254 | 10.5998 | 15909 | 65226 | 7.6893  | 0.7254 |
| g155 | VGF | ATGCCTGCAGGCGGCCGC <b>ATG</b> GATATTC  | 806  |      |         | 12255 |       |         |        |
|      | VGR | GAATATC <b>CAT</b> GCGGCCGCCTGCAGGCAT  | 8    | 1889 | 4.7068  | 11693 | 48382 | 5.7036  | 1.2118 |

|                        |     |                                |       |      |         |  |        |       |        |        |
|------------------------|-----|--------------------------------|-------|------|---------|--|--------|-------|--------|--------|
|                        | GVF | TAGGTGAGTAGGCTAGCTCTAGAGGATC   | 122   |      |         |  | 12197  |       |        |        |
|                        | GVR | GATCCTCTAGAGCTAGCCTACTCACCTA   | 953   |      |         |  | 12237  |       |        |        |
| <i>g<sup>156</sup></i> | VGF | ATGCCTGCAGGCGGCCGCGCATGGGAATTA | 1958  |      |         |  | 5361   |       |        |        |
|                        | VGR | TAATTCCCATGCGGCCGCGCTGCAGGCAT  | 6     |      |         |  | 4467   |       |        |        |
|                        | GVF | GTTATGAGTAAGCTAGCTCTAGAGGATC   | 78    |      |         |  | 5644   |       |        |        |
|                        | GVR | GATCCTCTAGAGCTAGCTTACTCATAAC   | 2134  | 4176 | 10.4054 |  | 4467   | 19939 | 2.3505 | 0.2259 |
|                        |     |                                |       |      |         |  |        |       |        |        |
| <i>g<sup>159</sup></i> | VGF | ATGCCTGCAGGCGGCCGCGCATGAAGTTCA | 1799  |      |         |  | 5820   |       |        |        |
|                        | VGR | TGAACTTCATGCGGCCGCGCTGCAGGCAT  | 10    |      |         |  | 5161   |       |        |        |
|                        | GVF | ATTTCTTATAGGCTAGCTCTAGAGGATC   | 49    |      |         |  | 5817   |       |        |        |
|                        | GVR | GATCCTCTAGAGCTAGCCTATAAGAAAT   | 1609  | 3467 | 8.6388  |  | 5529   | 22327 | 2.6320 | 0.3047 |
| <i>g<sup>166</sup></i> | VGF | ATGCCTGCAGGCGGCCGCGCATGTTTATTT | 1205  |      |         |  | 14716  |       |        |        |
|                        | VGR | AAATAAACATGCGGCCGCGCTGCAGGCAT  | 3     |      |         |  | 13389  |       |        |        |
|                        | GVF | TCATTGAGTAAAGCTAGCTCTAGAGGATC  | 68    |      |         |  | 16807  |       |        |        |
|                        | GVR | GATCCTCTAGAGCTAGCTTACTCAATGA   | 1201  | 2477 | 6.1720  |  | 13822  | 58734 | 6.9239 | 1.1218 |
| <i>g<sup>169</sup></i> | VGF | ATGCCTGCAGGCGGCCGCGCATGGAAATGG | 522   |      |         |  | 13832  |       |        |        |
|                        | VGR | CCATTTCCATGCGGCCGCGCTGCAGGCAT  | 8     |      |         |  | 12031  |       |        |        |
|                        | GVF | AAAGGAGGTAGGCTAGCTCTAGAGGATC   | 85    |      |         |  | 15266  |       |        |        |
|                        | GVR | GATCCTCTAGAGCTAGCCTACCTCCTTT   | 545   | 1160 | 2.8904  |  | 12422  | 53551 | 6.3129 | 2.1841 |
| <i>g<sup>171</sup></i> | VGF | ATGCCTGCAGGCGGCCGCGCATGTTATAC  | 141   |      |         |  | 14296  |       |        |        |
|                        | VGR | GTATAACCATGCGGCCGCGCTGCAGGCAT  | 7     |      |         |  | 15531  |       |        |        |
|                        | GVF | ATGGTGAGTAAAGCTAGCTCTAGAGGATC  | 127   |      |         |  | 18288  |       |        |        |
|                        | GVR | GATCCTCTAGAGCTAGCTTACTCACCAT   | 288   | 563  | 1.4028  |  | 13772  | 61887 | 7.2956 | 5.2006 |
| <i>Total</i>           |     |                                | 40133 |      |         |  | 848275 |       |        |        |
| 5                      | VGF | ATGCCTGCAGGCGGCCGCGCATGGTGAGTA | 2563  |      |         |  | 3951   |       |        |        |
|                        | VGR | TACTCACCATGCGGCCGCGCTGCAGGCAT  | 1953  |      |         |  | 3861   |       |        |        |
|                        | GVF | AAAATGAATAAGGTACCGAGCTCGAATT   | 1872  |      |         |  | 4162   |       |        |        |
|                        | GVR | AATTCGAGCTCGGTACCTATTTCATTTT   | 1876  | 8264 | 15.4612 |  | 3654   | 15628 | 2.4312 | 0.1572 |
|                        |     |                                |       |      |         |  |        |       |        |        |
|                        | VGF | ATGCCTGCAGGCGGCCGCGCATGAATAAAG | 430   |      |         |  | 9036   |       |        |        |
|                        | VGR | CTTTATTTCATGCGGCCGCGCTGCAGGCAT | 3     |      |         |  | 9107   |       |        |        |
|                        | GVF | AACCAGGCTAAGCTAGCTCTAGAGGATC   | 108   |      |         |  | 10610  |       |        |        |
|                        | GVR | GATCCTCTAGAGCTAGCTTAGCCTGGTT   | 791   | 1332 | 2.4920  |  | 9070   | 37823 | 5.8840 | 2.3611 |
|                        |     |                                |       |      |         |  |        |       |        |        |
|                        | VGF | ATGCCTGCAGGCGGCCGCGCATGATAAGCT | 2655  |      |         |  | 1577   |       |        |        |
|                        | VGR | AGCTTATCATGCGGCCGCGCTGCAGGCAT  | 1501  |      |         |  | 1506   |       |        |        |
|                        | GVF | TTTTACTATAGGGTACCGAGCTCGAATT   | 1504  |      |         |  | 1581   |       |        |        |
|                        | GVR | AATTCGAGCTCGGTACCTATAGTAAAA    | 1505  | 7165 | 13.4051 |  | 1287   | 5951  | 0.9258 | 0.0691 |



|                         |     |                               |      |      |        |       |       |        |        |
|-------------------------|-----|-------------------------------|------|------|--------|-------|-------|--------|--------|
| <i>g</i> <sup>176</sup> | VGF | ATGCCTGCAGGCGGCCGCATGGATTTTA  | 203  |      |        | 13572 |       |        |        |
|                         | VGR | TAAAATCCATGCGGCCGCCTGCAGGCAT  | 13   |      |        | 13653 |       |        |        |
|                         | GVF | GAAATGACTAAGCTAGCTCTAGAGGATC  | 142  |      |        | 19780 |       |        |        |
|                         | GVR | GATCCTCTAGAGCTAGCTTAATCATTTTC | 310  | 668  | 1.2498 | 11411 | 58416 | 9.0876 | 7.2714 |
| <i>g</i> <sup>177</sup> | VGF | ATGCCTGCAGGCGGCCGCATGACTAAAG  | 939  |      |        | 5024  |       |        |        |
|                         | VGR | CTTTAGTCATGCGGCCGCCTGCAGGCAT  | 3    |      |        | 4536  |       |        |        |
|                         | GVF | AAGCATTTTAAAGCTAGCTCTAGAGGATC | 48   |      |        | 4907  |       |        |        |
|                         | GVR | GATCCTCTAGAGCTAGCTTAATAATGCTT | 1486 | 2476 | 4.6324 | 4815  | 19282 | 2.9996 | 0.6475 |
| <i>g</i> <sup>179</sup> | VGF | ATGCCTGCAGGCGGCCGCATGGATATAC  | 2048 |      |        | 16889 |       |        |        |
|                         | VGR | GTATATCCATGCGGCCGCCTGCAGGCAT  | 7    |      |        | 13147 |       |        |        |
|                         | GVF | TAATGTTATAAGCTAGCTCTAGAGGATC  | 75   |      |        | 15998 |       |        |        |
|                         | GVR | GATCCTCTAGAGCTAGCTTAATAACATTA | 1832 | 3962 | 7.4125 | 14793 | 60827 | 9.4626 | 1.2766 |
| <i>g</i> <sup>181</sup> | VGF | ATGCCTGCAGGCGGCCGCATGCTATGG   | 972  |      |        | 8760  |       |        |        |
|                         | VGR | CCATAGGCATGCGGCCGCCTGCAGGCAT  | 7    |      |        | 7904  |       |        |        |
|                         | GVF | CATTTTCTTAAAGCTAGCTCTAGAGGATC | 52   |      |        | 8649  |       |        |        |
|                         | GVR | GATCCTCTAGAGCTAGCTTAAGAAAATG  | 1386 | 2417 | 4.5220 | 7246  | 32559 | 5.0651 | 1.1201 |
| <i>g</i> <sup>182</sup> | VGF | ATGCCTGCAGGCGGCCGCATGATTAATA  | 1575 |      |        | 11392 |       |        |        |
|                         | VGR | TATTAATCATGCGGCCGCCTGCAGGCAT  | 10   |      |        | 8969  |       |        |        |
|                         | GVF | TACAATTATAGGCTAGCTCTAGAGGATC  | 54   |      |        | 12104 |       |        |        |
|                         | GVR | GATCCTCTAGAGCTAGCCTATAATTGTA  | 1691 | 3330 | 6.2301 | 9725  | 42190 | 6.5633 | 1.0535 |
| <i>g</i> <sup>183</sup> | VGF | ATGCCTGCAGGCGGCCGCATGAGAGAAG  | 2133 |      |        | 16463 |       |        |        |
|                         | VGR | CTTCTCTCATGCGGCCGCCTGCAGGCAT  | 11   |      |        | 14642 |       |        |        |
|                         | GVF | AGGAAAAATAAAGCTAGCTCTAGAGGATC | 187  |      |        | 16520 |       |        |        |
|                         | GVR | GATCCTCTAGAGCTAGCTTATTTTTCCT  | 2114 | 4445 | 8.3162 | 15280 | 62905 | 9.7859 | 1.1767 |
| <i>g</i> <sup>185</sup> | VGF | ATGCCTGCAGGCGGCCGCATGAATGAGT  | 161  |      |        | 12612 |       |        |        |
|                         | VGR | ACTCATTTCATGCGGCCGCCTGCAGGCAT | 7    |      |        | 13467 |       |        |        |
|                         | GVF | AGGAGAGATAAGCTAGCTCTAGAGGATC  | 205  |      |        | 18012 |       |        |        |
|                         | GVR | GATCCTCTAGAGCTAGCTTATCTCTCCT  | 344  | 717  | 1.3414 | 11823 | 55914 | 8.6983 | 6.4843 |
| <i>g</i> <sup>187</sup> | VGF | ATGCCTGCAGGCGGCCGCATGAAGCAGA  | 1979 |      |        | 2574  |       |        |        |
|                         | VGR | TCTGCTTCATGCGGCCGCCTGCAGGCAT  | 27   |      |        | 1955  |       |        |        |
|                         | GVF | TAGATATTTAAAGCTAGCTCTAGAGGATC | 130  |      |        | 2518  |       |        |        |
|                         | GVR | GATCCTCTAGAGCTAGCTTAATAATCTA  | 2000 | 4136 | 7.7381 | 1748  | 8795  | 1.3682 | 0.1768 |
| <i>g</i> <sup>188</sup> | VGF | ATGCCTGCAGGCGGCCGCATGAACAAAG  | 1783 |      |        | 14223 |       |        |        |
|                         | VGR | CTTTGTTTCATGCGGCCGCCTGCAGGCAT | 11   |      |        | 11812 |       |        |        |
|                         | GVF | TTATAAAGTAGGCTAGCTCTAGAGGATC  | 77   | 3433 | 6.4228 | 12860 | 50504 | 7.8567 | 1.2232 |

|           |       |                               |       |      |         |        |        |         |        |
|-----------|-------|-------------------------------|-------|------|---------|--------|--------|---------|--------|
|           | GVR   | GATCCTCTAGAGCTAGCCTACTTTATAA  | 1562  |      |         | 11609  |        |         |        |
| $g^{190}$ | VGF   | ATGCCTGCAGGCGGCCGCATGAATGGTA  | 1893  |      |         | 8627   |        |         |        |
|           | VGR   | TACCATTGCGGCCGCCTGCAGGCAT     | 14    |      |         | 7671   |        |         |        |
|           | GVF   | TGAGTCAATAGCTAGCTCTAGAGGATC   | 144   |      |         | 8981   |        |         |        |
|           | GVR   | GATCCTCTAGAGCTAGCTTATTGACTCA  | 1927  | 3978 | 7.4425  | 8067   | 33346  | 5.1875  | 0.6970 |
|           | VGF   | ATGCCTGCAGGCGGCCGCATGGTAATTG  | 1389  |      |         | 15268  |        |         |        |
| $g^{191}$ | VGR   | CAATTACGCGGCCGCCTGCAGGCAT     | 11    |      |         | 13432  |        |         |        |
|           | GVF   | ATAAGGAGTAGCTAGCTCTAGAGGATC   | 64    |      |         | 15746  |        |         |        |
|           | GVR   | GATCCTCTAGAGCTAGCTCACTCCTTAT  | 1271  | 2735 | 5.1169  | 14498  | 58944  | 9.1697  | 1.7920 |
|           | VGF   | ATGCCTGCAGGCGGCCGCATGGAATTTA  | 649   |      |         | 10453  |        |         |        |
| $g^{192}$ | VGR   | TAAATTCCGCGGCCGCCTGCAGGCAT    | 11    |      |         | 10588  |        |         |        |
|           | GVF   | ACATACTATGAGCTAGCTCTAGAGGATC  | 66    |      |         | 12407  |        |         |        |
|           | GVR   | GATCCTCTAGAGCTAGCTCATAGTATGT  | 756   | 1482 | 2.7727  | 10773  | 44221  | 6.8793  | 2.4811 |
|           | VGF   | ATGCCTGCAGGCGGCCGCCTGGAGAAAT  | 1498  |      |         | 14979  |        |         |        |
| $g^{194}$ | VGR   | ATTTCTCCACGCGGCCGCCTGCAGGCAT  | 4     |      |         | 12749  |        |         |        |
|           | GVF   | GAGGGAAAAGCTAGCTCTAGAGGATC    | 112   |      |         | 16970  |        |         |        |
|           | GVR   | GATCCTCTAGAGCTAGCTTATTTCCCTC  | 1296  | 2910 | 5.4443  | 10810  | 55508  | 8.6352  | 1.5861 |
|           | Total |                               | 53450 |      |         | 642813 |        |         |        |
| $g^{195}$ | VGF   | ATGCCTGCAGGCGGCCGCATGGAATATT  | 576   |      |         | 21518  |        |         |        |
|           | VGR   | AATATTCCGCGGCCGCCTGCAGGCAT    | 3     |      |         | 21476  |        |         |        |
|           | GVF   | TATTCTTTAGCTAGCTCTAGAGGATC    | 55    |      |         | 24508  |        |         |        |
|           | GVR   | GATCCTCTAGAGCTAGCTTAAAGAATA   | 634   | 1268 | 4.7775  | 20210  | 87712  | 13.9325 | 2.9163 |
| $g^{196}$ | VGF   | ATGCCTGCAGGCGGCCGCATGAAACATT  | 113   |      |         | 22625  |        |         |        |
|           | VGR   | AATGTTTCGCGGCCGCCTGCAGGCAT    | 2     |      |         | 26451  |        |         |        |
|           | GVF   | GTAGAAATAGCTAGCTCTAGAGGATC    | 84    |      |         | 28687  |        |         |        |
|           | GVR   | GATCCTCTAGAGCTAGCTTAAATTTCTAC | 297   | 496  | 1.8688  | 22396  | 100159 | 15.9096 | 8.5133 |
| $g^{198}$ | VGF   | ATGCCTGCAGGCGGCCGCATGAAAGTAG  | 1272  |      |         | 16580  |        |         |        |
|           | VGR   | CTACTTTGCGGCCGCCTGCAGGCAT     | 9     |      |         | 14317  |        |         |        |
|           | GVF   | AGGAAAAATAGCTAGCTCTAGAGGATC   | 34    |      |         | 15988  |        |         |        |
|           | GVR   | GATCCTCTAGAGCTAGCTTATTTTTCCT  | 918   | 2233 | 8.4134  | 14888  | 61773  | 9.8123  | 1.1663 |
| $g^{199}$ | VGF   | ATGCCTGCAGGCGGCCGCCTGCTAATA   | 1585  |      |         | 31107  |        |         |        |
|           | VGR   | TATTAGACGCGGCCGCCTGCAGGCAT    | 3     |      |         | 27280  |        |         |        |
|           | GVF   | TTAAAAATAGCTAGCTCTAGAGGATC    | 51    |      |         | 28325  |        |         |        |
|           | GVR   | GATCCTCTAGAGCTAGCTTAAATTTTAA  | 2520  | 4159 | 15.6701 | 30016  | 116728 | 18.5415 | 1.1832 |
| $g^{201}$ | VGF   | ATGCCTGCAGGCGGCCGCATGAATTATG  | 129   | 570  | 2.1476  | 5882   | 24692  | 3.9222  | 1.8263 |

|                  |     |                                          |      |      |        |  |       |       |        |        |
|------------------|-----|------------------------------------------|------|------|--------|--|-------|-------|--------|--------|
|                  | VGR | CATAATT <b>CAT</b> GCGGCCGCCTGCAGGCAT    | 1    |      |        |  | 5945  |       |        |        |
|                  | GVF | TTTTATTT <b>TAA</b> GCTAGCTCTAGAGGATC    | 40   |      |        |  | 7118  |       |        |        |
|                  | GVR | GATCCTCTAGAG <b>GCTAGCTTA</b> AAAAATAAAA | 400  |      |        |  | 5747  |       |        |        |
| g <sup>202</sup> | VGF | ATGCCTGCAGG <b>GCGGCCGCAT</b> GAATTATA   | 98   |      |        |  | 2961  |       |        |        |
|                  | VGR | TATAATT <b>CAT</b> GCGGCCGCCTGCAGGCAT    | 1    |      |        |  | 3102  |       |        |        |
|                  | GVF | AGGGGT <b>TAA</b> GCTAGCTCTAGAGGATC      | 119  |      |        |  | 3790  |       |        |        |
|                  | GVR | GATCCTCTAGAG <b>GCTAGCTTA</b> TAACCCCT   | 574  | 792  | 2.9841 |  | 2962  | 12815 | 2.0356 | 0.6822 |
| g <sup>204</sup> | VGF | ATGCCTGCAGG <b>GCGGCCGCAT</b> GTATCCTG   | 608  |      |        |  | 9444  |       |        |        |
|                  | VGR | CAGGATA <b>CAT</b> GCGGCCGCCTGCAGGCAT    | 1    |      |        |  | 7892  |       |        |        |
|                  | GVF | CAACAAA <b>TGA</b> GCTAGCTCTAGAGGATC     | 78   |      |        |  | 9925  |       |        |        |
|                  | GVR | GATCCTCTAGAG <b>GCTAGCTCA</b> TTTTGTG    | 1376 | 2063 | 7.7729 |  | 8468  | 35729 | 5.6753 | 0.7301 |
| g <sup>206</sup> | VGF | ATGCCTGCAGG <b>GCGGCCGCAT</b> GTAAAAAT   | 797  |      |        |  | 13275 |       |        |        |
|                  | VGR | ATTTTAC <b>CAT</b> GCGGCCGCCTGCAGGCAT    | 5    |      |        |  | 11383 |       |        |        |
|                  | GVF | GAGAATAC <b>TAA</b> GCTAGCTCTAGAGGATC    | 137  |      |        |  | 13683 |       |        |        |
|                  | GVR | GATCCTCTAGAG <b>GCTAGCTTA</b> GTATTCTC   | 1403 | 2342 | 8.8241 |  | 12359 | 50700 | 8.0534 | 0.9127 |
| g <sup>208</sup> | VGF | ATGCCTGCAGG <b>GCGGCCGCAT</b> GATTTATA   | 157  |      |        |  | 4288  |       |        |        |
|                  | VGR | TATAAAT <b>CAT</b> GCGGCCGCCTGCAGGCAT    | 1    |      |        |  | 4228  |       |        |        |
|                  | GVF | TACAGCCA <b>TAG</b> GCTAGCTCTAGAGGATC    | 48   |      |        |  | 5572  |       |        |        |
|                  | GVR | GATCCTCTAGAG <b>GCTAGCTTA</b> TGGCTGTA   | 523  | 729  | 2.7467 |  | 4290  | 18378 | 2.9192 | 1.0628 |
| g <sup>209</sup> | VGF | ATGCCTGCAGG <b>GCGGCCGCAT</b> GATTATAG   | 269  |      |        |  | 3734  |       |        |        |
|                  | VGR | CTATAAT <b>CAT</b> GCGGCCGCCTGCAGGCAT    | 4    |      |        |  | 2978  |       |        |        |
|                  | GVF | GAGAGAAA <b>TAG</b> GCTAGCTCTAGAGGATC    | 652  |      |        |  | 4115  |       |        |        |
|                  | GVR | GATCCTCTAGAG <b>GCTAGCTTA</b> TTTCTCTC   | 620  | 1545 | 5.8212 |  | 3646  | 14473 | 2.2989 | 0.3949 |
| g <sup>210</sup> | VGF | ATGCCTGCAGG <b>GCGGCCGCAT</b> GAGTAATA   | 56   |      |        |  | 5881  |       |        |        |
|                  | VGR | TATTACT <b>CAT</b> GCGGCCGCCTGCAGGCAT    | 0    |      |        |  | 5983  |       |        |        |
|                  | GVF | CAGATAAA <b>TAA</b> GCTAGCTCTAGAGGATC    | 183  |      |        |  | 6909  |       |        |        |
|                  | GVR | GATCCTCTAGAG <b>GCTAGCTTA</b> TTTATCTG   | 388  | 627  | 2.3624 |  | 5843  | 24616 | 3.9101 | 1.6552 |
| g <sup>211</sup> | VGF | ATGCCTGCAGG <b>GCGGCCGCAT</b> GATGAATG   | 493  |      |        |  | 7520  |       |        |        |
|                  | VGR | CATTCAT <b>CAT</b> GCGGCCGCCTGCAGGCAT    | 0    |      |        |  | 6642  |       |        |        |
|                  | GVF | AAGGTATG <b>TAA</b> GCTAGCTCTAGAGGATC    | 87   |      |        |  | 8579  |       |        |        |
|                  | GVR | GATCCTCTAGAG <b>GCTAGCTTA</b> CATACCTT   | 1219 | 1799 | 6.7782 |  | 7327  | 30068 | 4.7761 | 0.7046 |
| g <sup>212</sup> | VGF | ATGCCTGCAGG <b>GCGGCCGCAT</b> GAAAAAAC   | 509  |      |        |  | 2261  |       |        |        |
|                  | VGR | GTTTTTT <b>CAT</b> GCGGCCGCCTGCAGGCAT    | 62   |      |        |  | 1753  |       |        |        |
|                  | GVF | AAGGAGAT <b>TAA</b> GCTAGCTCTAGAGGATC    | 221  |      |        |  | 2100  |       |        |        |
|                  | GVR | GATCCTCTAGAG <b>GCTAGCTTA</b> ATCTCCTT   | 996  | 1788 | 6.7367 |  | 1831  | 7945  | 1.2620 | 0.1873 |

|           |     |                               |       |      |         |        |       |        |        |
|-----------|-----|-------------------------------|-------|------|---------|--------|-------|--------|--------|
| $g^{213}$ | VGF | ATGCCTGCAGGCGGCCGCATGTATATAT  | 974   |      |         | 6394   |       |        |        |
|           | VGR | ATATATACATGCGGCCGCCTGCAGGCAT  | 179   |      |         | 6264   |       |        |        |
|           | GVF | ATGACTTATGAGCTAGCTCTAGAGGATC  | 254   |      |         | 8408   |       |        |        |
|           | GVR | GATCCTCTAGAGCTAGCTCATTAAGTCAT | 1562  | 2969 | 11.1865 | 6269   | 27335 | 4.3420 | 0.3881 |
| $g^{215}$ | VGF | ATGCCTGCAGGCGGCCGCATGATAAATA  | 216   |      |         | 2012   |       |        |        |
|           | VGR | TATTTATCATGCGGCCGCCTGCAGGCAT  | 68    |      |         | 1869   |       |        |        |
|           | GVF | AACGATGGTAACTAGCTCTAGAGGATC   | 125   |      |         | 2756   |       |        |        |
|           | GVR | GATCCTCTAGAGCTAGCTTACCATCGTT  | 755   | 1164 | 4.3857  | 1857   | 8494  | 1.3492 | 0.3076 |
| $g^{216}$ | VGF | ATGCCTGCAGGCGGCCGCATGAATGCTA  | 589   |      |         | 2226   |       |        |        |
|           | VGR | TAGCATTTCATGCGGCCGCCTGCAGGCAT | 64    |      |         | 1729   |       |        |        |
|           | GVF | TTAGTTGGTAACTAGCTCTAGAGGATC   | 265   |      |         | 2040   |       |        |        |
|           | GVR | GATCCTCTAGAGCTAGCTTACCCTAA    | 1079  | 1997 | 7.5242  | 1937   | 7932  | 1.2599 | 0.1675 |
| Total     |     |                               | 26541 |      |         | 629549 |       |        |        |
