# Supplementary material for: Discovery of Bactericidal Proteins from Staphylococcus Phage Stab21 Using a High-Throughput Screening Method
Source: MDPI journal article supplement (doi:10.3390/antibiotics12071213), 2023-07-21
Supplement: s1 [file s1]

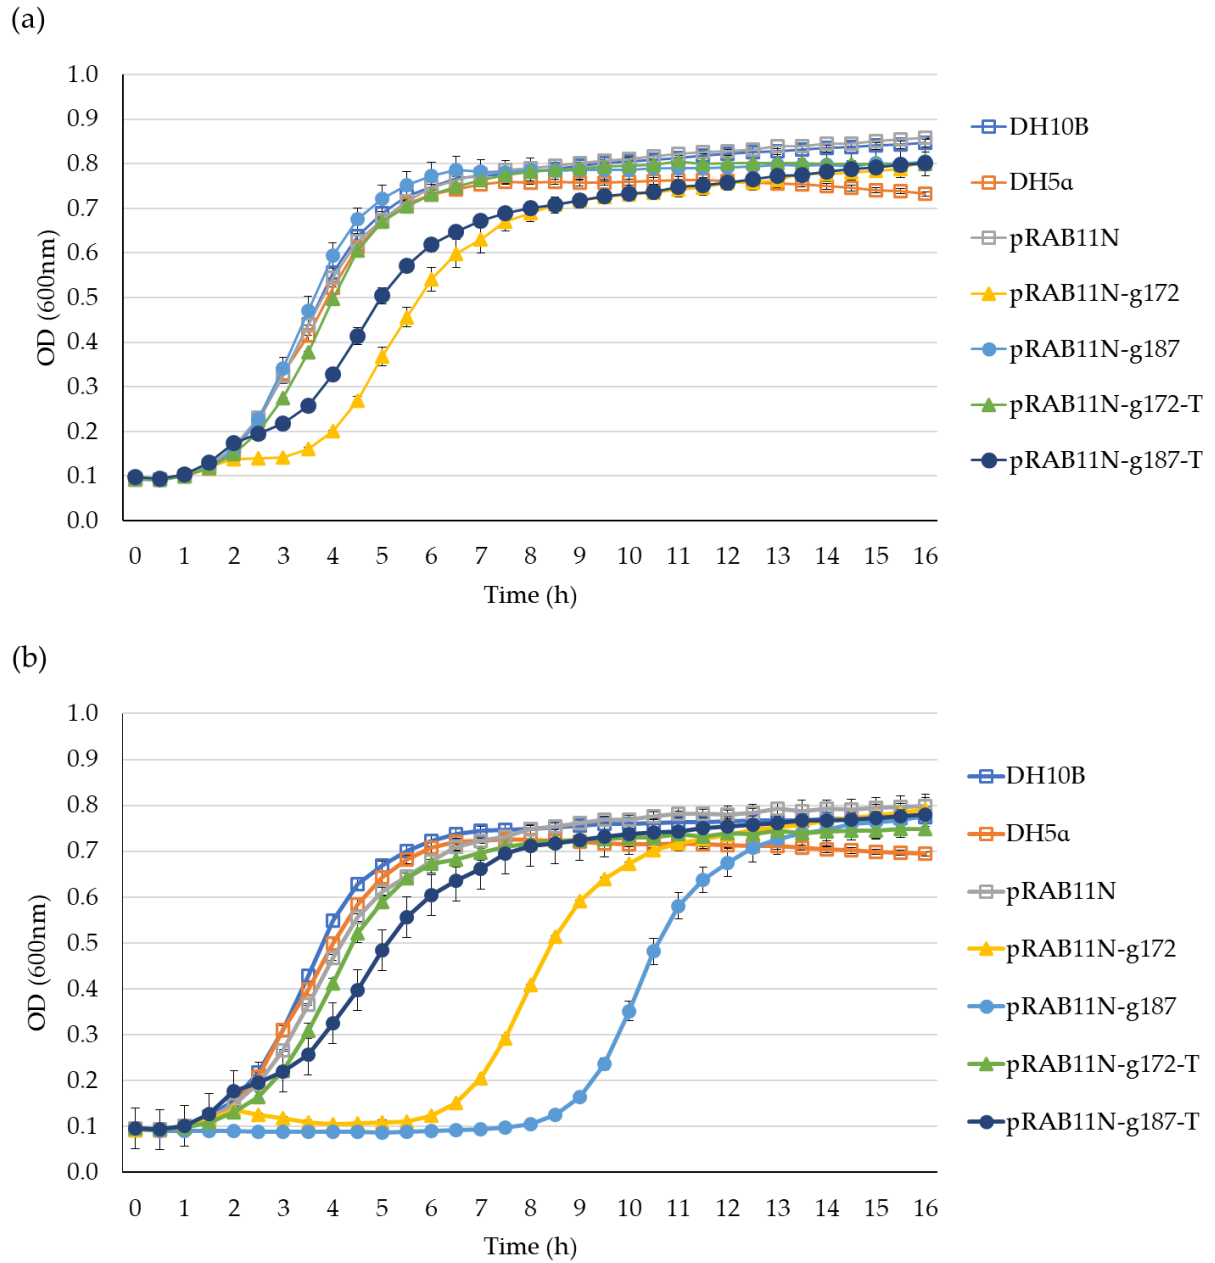

**Figure S6.** ATc sensitive and tolerant *E. coli* DH10B/pRAB11N-toxHPUF toxicity screening. (a) Toxicity screening without anhydrotetracycline (ATc) induction; (b) Toxicity screening with ATc induction. Error bars show  $\pm$  standard deviation calculated using triplicate results. OD, optical density.
