# Supplementary material for: Discovery of Bactericidal Proteins from Staphylococcus Phage Stab21 Using a High-Throughput Screening Method
Source: MDPI journal article supplement (doi:10.3390/antibiotics12071213), 2023-07-21
Supplement: s1 [file s1]

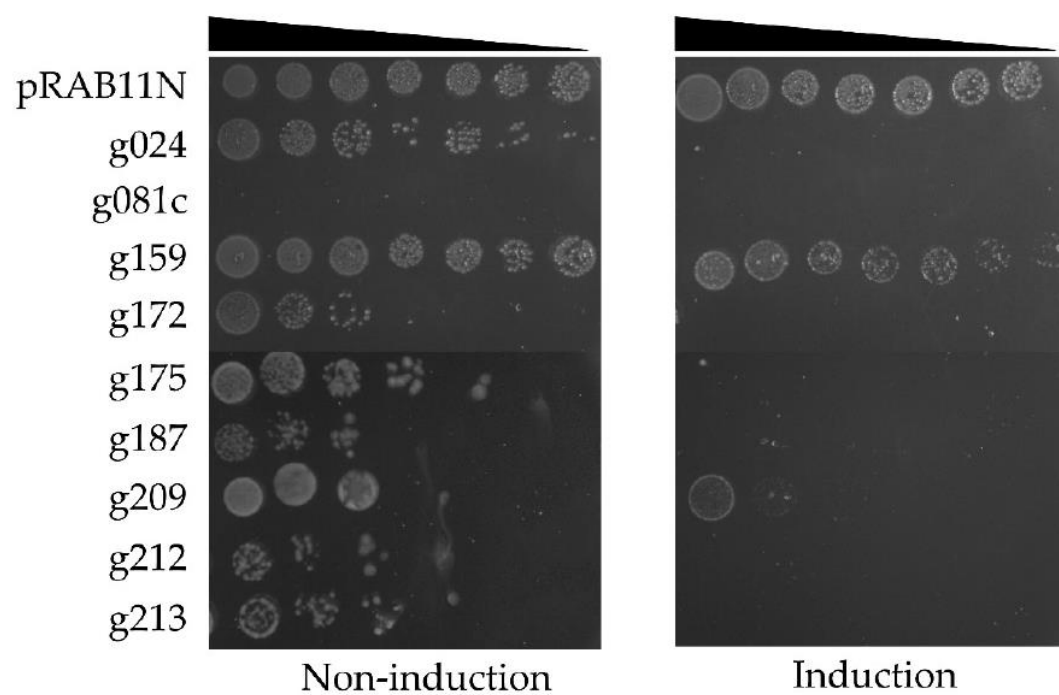

**Figure S2.** Toxicity drop test of *E. coli* DH10B/pRAB11N-HPUFs. Genes under non-inducing conditions in the absence of anhydrotetracycline (ATc) and genes inducing conditions in the presence of ATc (0.4  $\mu$ M).
