# Supplementary material for: Discovery of Bactericidal Proteins from Staphylococcus Phage Stab21 Using a High-Throughput Screening Method
Source: MDPI journal article supplement (doi:10.3390/antibiotics12071213), 2023-07-21
Supplement: s1 [file s1]

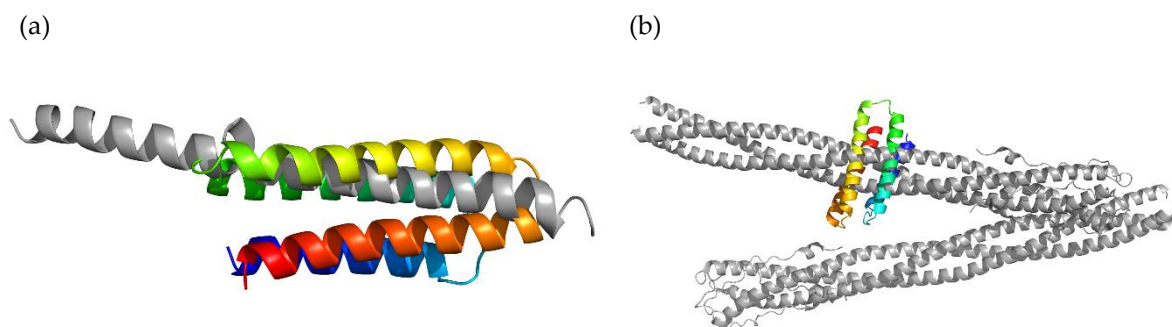

**Figure S9.** Superimposition of Gp081c (rainbow, N-terminus blue, C-terminus red) with (a) the top Phyre2 model of *Saccharomyces cerevisiae* monopolin complex protein subunit CSM1 (grey) and (b) the best hit of HHPred functional models of *Enterobacter* phage 22 tail needle protein Gp26 (grey).
