# Supplementary figures and images for: Discovery of Bactericidal Proteins from Staphylococcus Phage Stab21 Using a High-Throughput Screening Method
Source: MDPI journal article supplement (doi:10.3390/antibiotics12071213), 2023-07-21

**Figure S1.** Relative joint-sequence reads ratios for non-toxic genes from Stab21 phage.

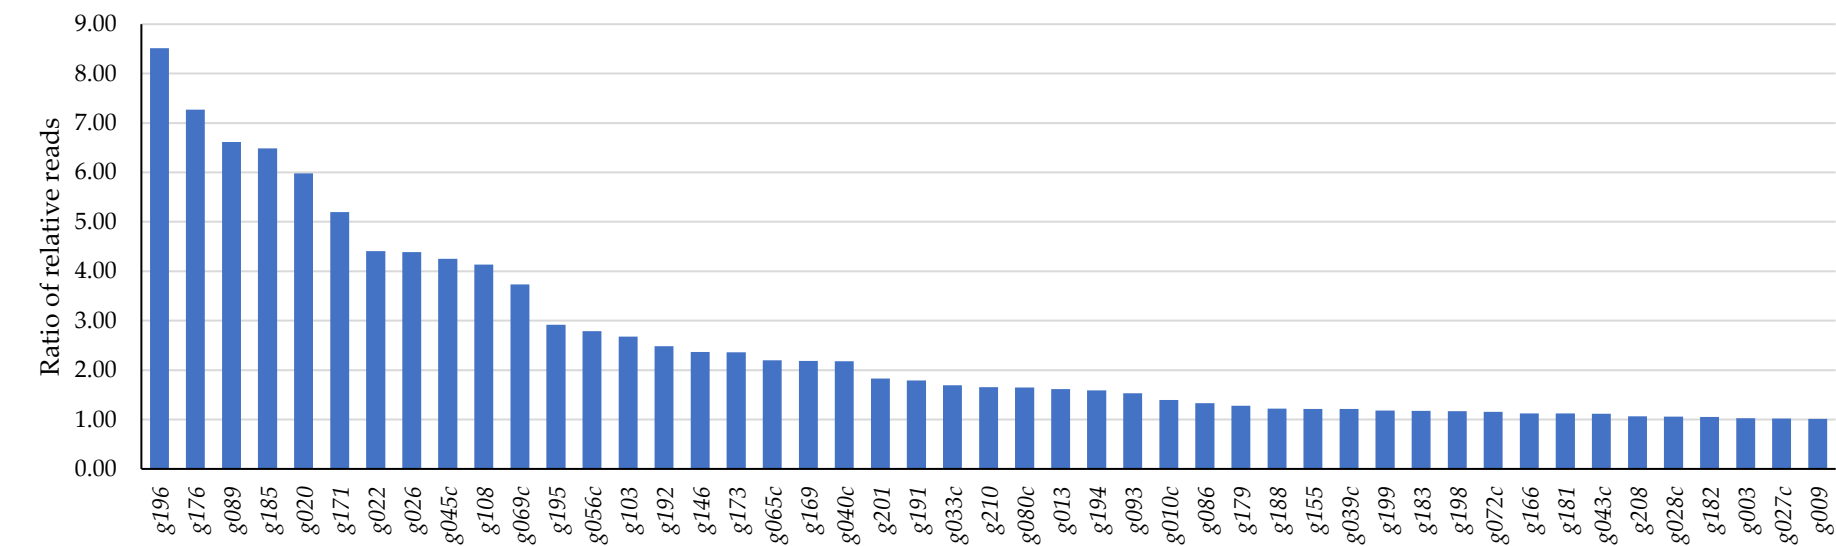

Supplement: s1 [file s1]
